# Supplementary material
Source: Royal Society of Chemistry journal article supplement (doi:10.1039/d6cc00607h)
Supplement: d6cc00607h1.pdf [file d6cc00607h1.pdf]

Electronic Supplementary Material (ESI) for ChemComm.  
This journal is © The Royal Society of Chemistry 2026

Supporting Information for

**A quinazolinone-linked covalent organic framework with an intrinsic N-N bond for efficient palladium nanocatalysis**

Xu-Hao Zhang,<sup>‡</sup> Xiu-Hao Zhang,<sup>‡</sup> Fu-Hao Liu,<sup>‡</sup> Fei Li, Yan Geng,<sup>\*</sup> and Bing-Jian Yao<sup>\*</sup>

College of Chemistry, Chemical Engineering and Materials Science, Collaborative Innovation Center of Functionalized Probes for Chemical Imaging in Universities of Shandong, Key Laboratory of Molecular and Nano Probes, Ministry of Education, Shandong Normal University, Jinan 250014, P. R. China.

<sup>‡</sup> These authors contributed equally to this work.

Email: [gengyan@sdu.edu.cn](mailto:gengyan@sdu.edu.cn); [yaobingjian1986@163.com](mailto:yaobingjian1986@163.com)

## Content

|                                                                                      |            |
|--------------------------------------------------------------------------------------|------------|
| 1. Experimental section.....                                                         | (page S1)  |
| 2. Characterization of model compound and monomers.....                              | (page S4)  |
| 3. Characterization of <b>AABH-TFBT-COF</b> .....                                    | (page S8)  |
| 4. Characterization of <b>Pd@AABH-TFBT-COF</b> .....                                 | (page S15) |
| 5. <b>Pd@AABH-TFBT-COF</b> -catalyzed model reaction.....                            | (page S15) |
| 6. Scope of <b>Pd@AABH-TFBT-COF</b> -catalyzed Suzuki-Miyaura coupling reaction..... | (page S19) |
| 7. References.....                                                                   | (page S28) |

# 1. Experimental section

## 1.1 Instruments and materials

All chemicals were purchased from commercial suppliers and used without further purification unless otherwise specified. Fourier-transform infrared (FTIR) spectra were recorded on a Bruker ALPHA spectrometer in the wavenumber range of 500-4000  $\text{cm}^{-1}$ . High-resolution mass spectra (HRMS) were acquired using a Bruker maXis ultra-high-resolution time-of-flight mass spectrometer. Elemental analyses were performed on a PerkinElmer 2400 Series II CHNS/O analyzer. Solution-state  $^1\text{H}$  and  $^{13}\text{C}$  nuclear magnetic resonance (NMR) spectra were obtained on a Bruker Avance-400 HD spectrometer operating at 400 MHz and 100 MHz, respectively. Solid-state  $^{13}\text{C}$  cross-polarization magic-angle spinning (CP-MAS) NMR spectra were acquired on a Varian Mercury Plus 400 spectrometer at a  $^{13}\text{C}$  resonance frequency of 100 MHz. Powder X-ray diffraction (PXRD) patterns were collected on a Bruker D8 Advance diffractometer equipped with Cu K $\alpha$  radiation ( $\lambda = 1.5406 \text{ \AA}$ ), using a flat-plate sample holder and step-scanning mode. Scanning electron microscopy (SEM) images and energy-dispersive X-ray (EDX) spectroscopy data were acquired on a Zeiss Gemini SUPRA microscope. Transmission electron microscopy (TEM) images were recorded on a JEOL JEM-1400Plus instrument operated at 120 kV. Nitrogen adsorption-desorption isotherms were measured at 77 K using a Micromeritics ASAP 2020 surface area and porosity analyzer. Thermogravimetric analysis (TGA) was conducted on a METTLER TOLEDO TGA/DSC1 instrument under a flowing nitrogen atmosphere ( $30 \text{ mL}\cdot\text{min}^{-1}$ ) at a heating rate of  $15 \text{ }^\circ\text{C}\cdot\text{min}^{-1}$ . X-ray photoelectron spectroscopy (XPS) measurements were carried out on a Physical Electronics PHI-5000 Versaprobe II system using monochromated Al K $\alpha$  radiation (1486.6 eV) at 300 W. Inductively coupled plasma optical emission spectroscopy (ICP-OES) was performed on a Thermo Scientific iCAP RQ (formerly IRIS Intrepid II XSP) spectrometer; elemental quantification was validated using a Nu AttoM high-sensitivity ICP-MS where required. The monomer AABH was synthesized according to a literature procedure (see Section 1.2). The triazine-based aldehyde TFBT (1,3,5-tris-(4'-formylbiphenyl-4-yl)triazine) was purchased from Energy Chemical Co., Ltd. (Shanghai, China) and used as received.

## 1.2 Synthesis of 2-amino-N'-(2-aminobenzoyl) benzohydrazide (AABH)

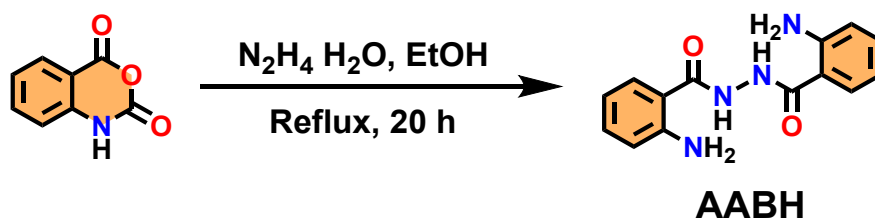

AABH was synthesized according to a literature procedure.<sup>1</sup> To a suspension of isatoic anhydride (5.98 g, 36.7 mmol) in anhydrous ethanol (30 mL), hydrazine hydrate (0.95 mL, 19.5 mmol) was added dropwise at room temperature. The resulting mixture was refluxed with vigorous stirring for 20 h. The precipitated solid was collected by vacuum filtration, washed sequentially with ice-cold ethanol (20 mL) and diethyl ether (20 mL), and dried under vacuum to afford AABH as a brown powder (2.5 g, 9.34 mmol, 51%).  $^1\text{H}$  NMR (400 MHz,  $\text{DMSO}-d_6$ , ppm):  $\delta = 10.03$  (s, 2H), 7.60 (d, 2H,  $J = 8$  Hz), 7.19 (t, 2H,  $J = 8$  Hz), 6.72 (d,

2H,  $J=12$  Hz), 6.54 (t, 2H,  $J=8$  Hz), 6.42 ppm (s, 4H).  $^{13}\text{C}$  NMR (100 MHz, DMSO- $d_6$ , ppm):  $\delta=168.92$ , 150.38, 132.73, 128.65, 116.86, 115.06, 113.08. HRMS (ESI):  $m/z$   $[\text{M}+\text{H}]^+$  calcd for  $\text{C}_{14}\text{H}_{14}\text{N}_4\text{O}_2$  271.1190; found, 271.1183.

### 1.3 Synthesis of model compound

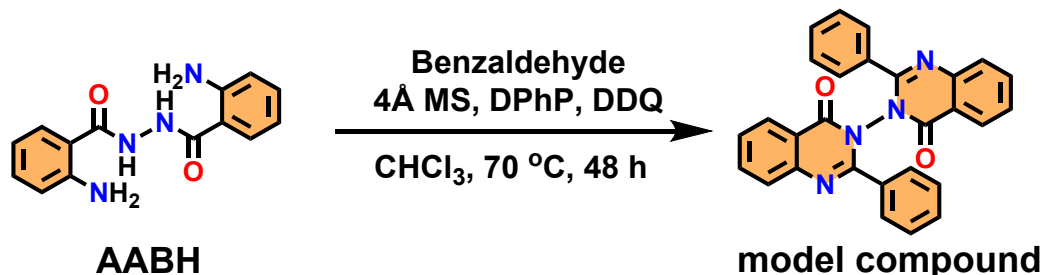

In a dried Schlenk flask equipped with a magnetic stir bar, activated 4 Å molecular sieves (200 mg) were introduced under a positive flow of argon. The flask was then charged with AABH (162 mg, 0.6 mmol), benzaldehyde (127 mg, 1.20 mmol), diphenyl phosphate (DPhP, 15 mg, 0.06 mmol), 2,3-dichloro-5,6-dicyano-1,4-benzoquinone (DDQ, 190 mg, 0.84 mmol), and chloroform (10 mL). The reaction mixture was heated to reflux in a preheated oil bath at 70 °C under a static argon atmosphere for 48 h. Upon completion, the mixture was cooled to room temperature and filtered through a celite pad to remove solids. The filtrate was concentrated under reduced pressure and the crude product was purified by flash column chromatography on silica gel (petroleum ether/ethyl acetate = 2:1) to afford the desired dual-quinazolinone as a white solid (134 mg, 95% yield).  $^1\text{H}$  NMR (400 MHz, DMSO- $d_6$ , ppm):  $\delta=8.39$  (d, 2H,  $J=8$  Hz), 8.00 (t, 2H,  $J=8$  Hz), 7.74 (m, 4H,  $J=8$  Hz), 7.48 (t, 2H,  $J=8$  Hz), 7.36 (t, 4H,  $J=8$  Hz), 7.16 ppm (d, 4H,  $J=8$  Hz).  $^{13}\text{C}$  NMR (100 MHz, DMSO- $d_6$ , ppm):  $\delta=159.85$ , 154.01, 146.61, 135.53, 132.22, 130.81, 128.31, 128.18, 127.85, 127.72, 120.83. HRMS (ESI):  $m/z$   $[\text{M}+\text{H}]^+$  calcd for  $\text{C}_{28}\text{H}_{18}\text{N}_4\text{O}_2$  443.1503; found, 443.1493.

### 1.4 Synthesis of AABH-TFBT-COF

A mixture of AABH (8.1 mg, 0.03 mmol), 1,3,5-tris-(4'-formyl-biphenyl-4-yl) triazine (TFBT, 12.4 mg, 0.02 mmol), DDQ (4.5 mg, 0.02 mmol), and DPhP (6 mg, 0.024 mmol) in mesitylene (1.0 mL) was sealed and heated at 120 °C for 5 days under air conditions. The resulting precipitate was isolated by centrifugation, washed sequentially with DMF and dichloromethane (DCM), and dried under high vacuum overnight to afford **AABH-TFBT-COF** as an off-white solid (16.5 mg, 85% yield). FTIR (KBr,  $\text{cm}^{-1}$ ): 3339 (w), 1675 (s), 1610 (s), 1571 (m), 1518 (s), 1418 (w), 1365 (m), 1246 (m), 1088 (w), 1005 (w), 910 (w), 840 (w), 816 (m), 769 (m), 681 (w).  $^{13}\text{C}$  CP-MAS solid-state NMR:  $\delta$  (ppm) 190.4, 168.8, 146.9, 142.8, 140.7, 134.6, 127.3, 120.5, 115.1. Elemental analysis (%) calcd for  $\text{C}_{21}\text{H}_{12}\text{N}_3\text{O}$ : C, 78.27; H, 3.72; N, 13.04. Found (%): C, 77.43; H, 4.27; N, 12.60.

### 1.5 Synthesis of Pd@AABH-TFBT-COF

**AABH-TFBT-COF** (70 mg) was dispersed in a methanol solution (35 mL) containing palladium(II) acetate ( $\text{Pd}(\text{OAc})_2$ , 20 mg). The suspension was stirred at 45 °C for 12 h. The solid was recovered by

centrifugation, washed repeatedly with DCM, and dried under vacuum at 60 °C for 12 h to afford **Pd(II)@AABH-TFBT-COF**. Subsequently, the obtained Pd(II)-loaded COF (70 mg) was suspended in water (30 mL) containing sodium borohydride (NaBH<sub>4</sub>, 20 mg) and stirred at room temperature for 10 h. The resulting black crystalline solid was isolated by centrifugation, washed with water and ethanol, and dried under vacuum to yield **Pd@AABH-TFBT-COF** as a black crystalline powder. As determined by inductively coupled plasma (ICP), the loading amount of Pd NPs was up to 16.54 wt%

### 1.6 Model Suzuki-Miyaura coupling reaction catalyzed by Pd@AABH-TFBT-COF

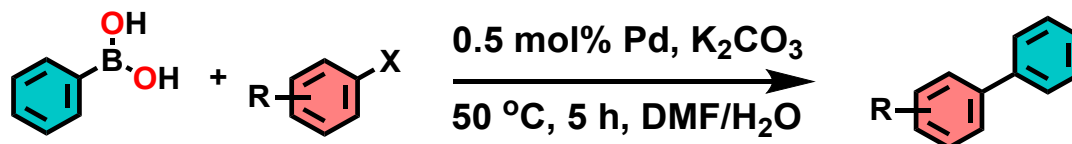

#### General procedure

A dried Schlenk flask was charged with **Pd@AABH-TFBT-COF** (3.3 mg, 0.5 mol% Pd nanoparticles), phenylboronic acid (1.0 mmol), bromobenzene (1.1 mmol), K<sub>2</sub>CO<sub>3</sub> (1.5 mmol), and a mixed solvent system of DMF/H<sub>2</sub>O (1.5 mL/1.5 mL). The reaction mixture was stirred at 50 °C for 5 h under an argon atmosphere, and reaction progress was monitored by thin-layer chromatography (TLC).

#### Leaching test

After 3 h of the Suzuki–Miyaura coupling reaction, the heterogeneous catalyst **Pd@AABH-TFBT-COF** was separated from the reaction mixture by centrifugation. The resulting catalyst-free supernatant was subjected to three vacuum–argon purge cycles to remove dissolved oxygen, then maintained at 50 °C under vigorous stirring. No further increase in biphenyl yield was detected over an additional 5 h, confirming that catalytic activity is attributable solely to the solid-supported palladium species and not to leached Pd species in solution.

#### Reusability assessment

Upon completion of each catalytic cycle, the **Pd@AABH-TFBT-COF** catalyst was recovered by centrifugation, washed sequentially with fresh reaction solvent (DMF/H<sub>2</sub>O, 3×15 mL) followed by petroleum ether (3×15 mL) to remove residual organic species and salts, and dried under reduced pressure. The recovered catalyst was reused directly in subsequent runs without chemical or thermal regeneration. For the recycling experiments, a 10 mmol scale reaction (33 mg of catalyst per cycle, corresponding to 0.5 mol% Pd) was performed.

## 2.Characterization of model compound and monomers

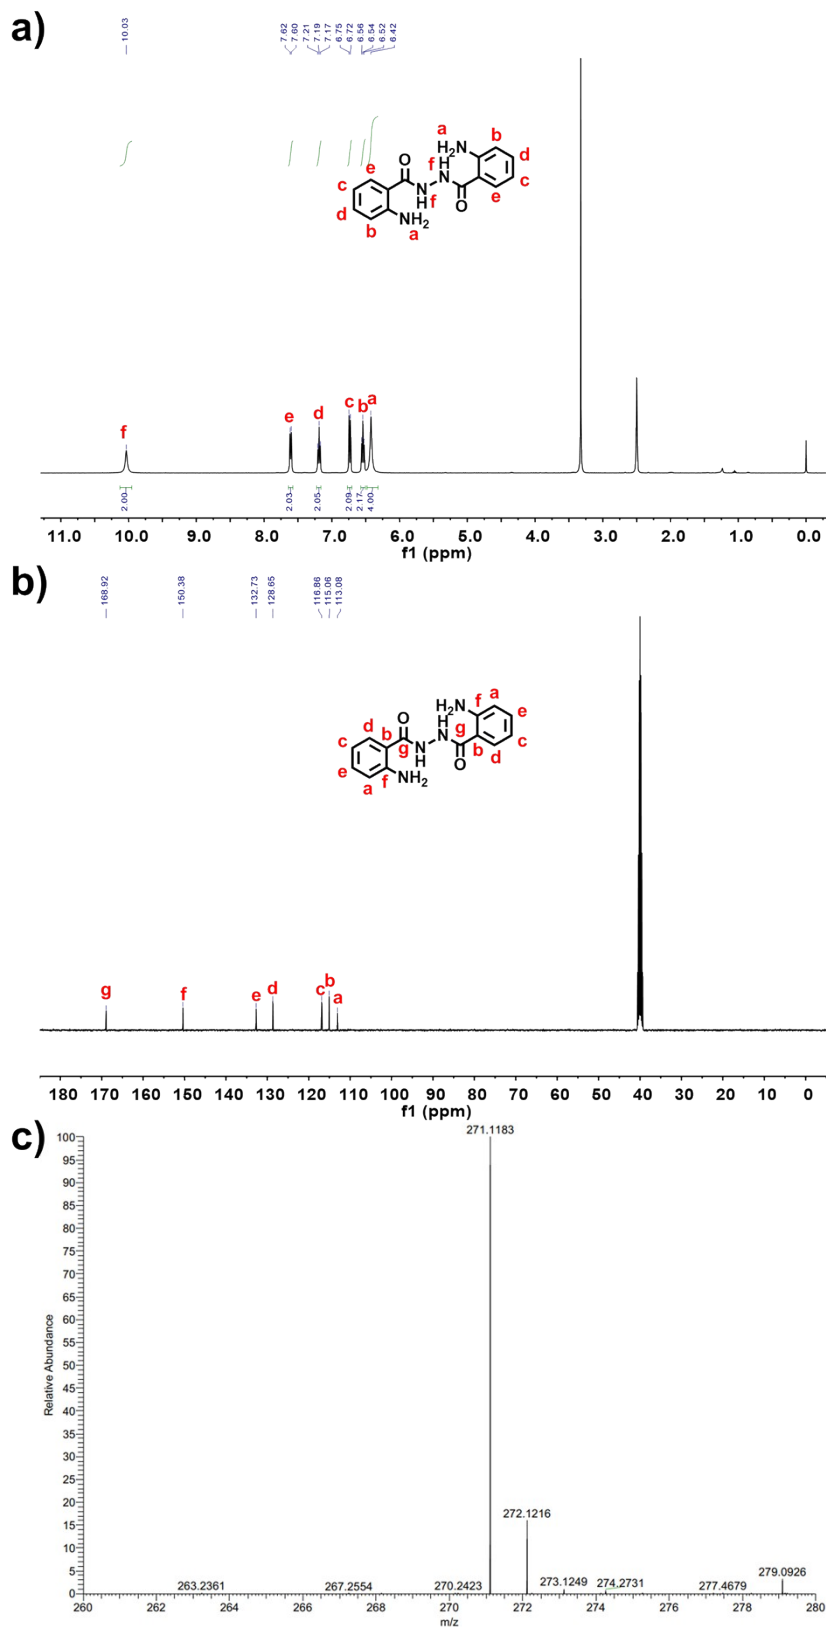

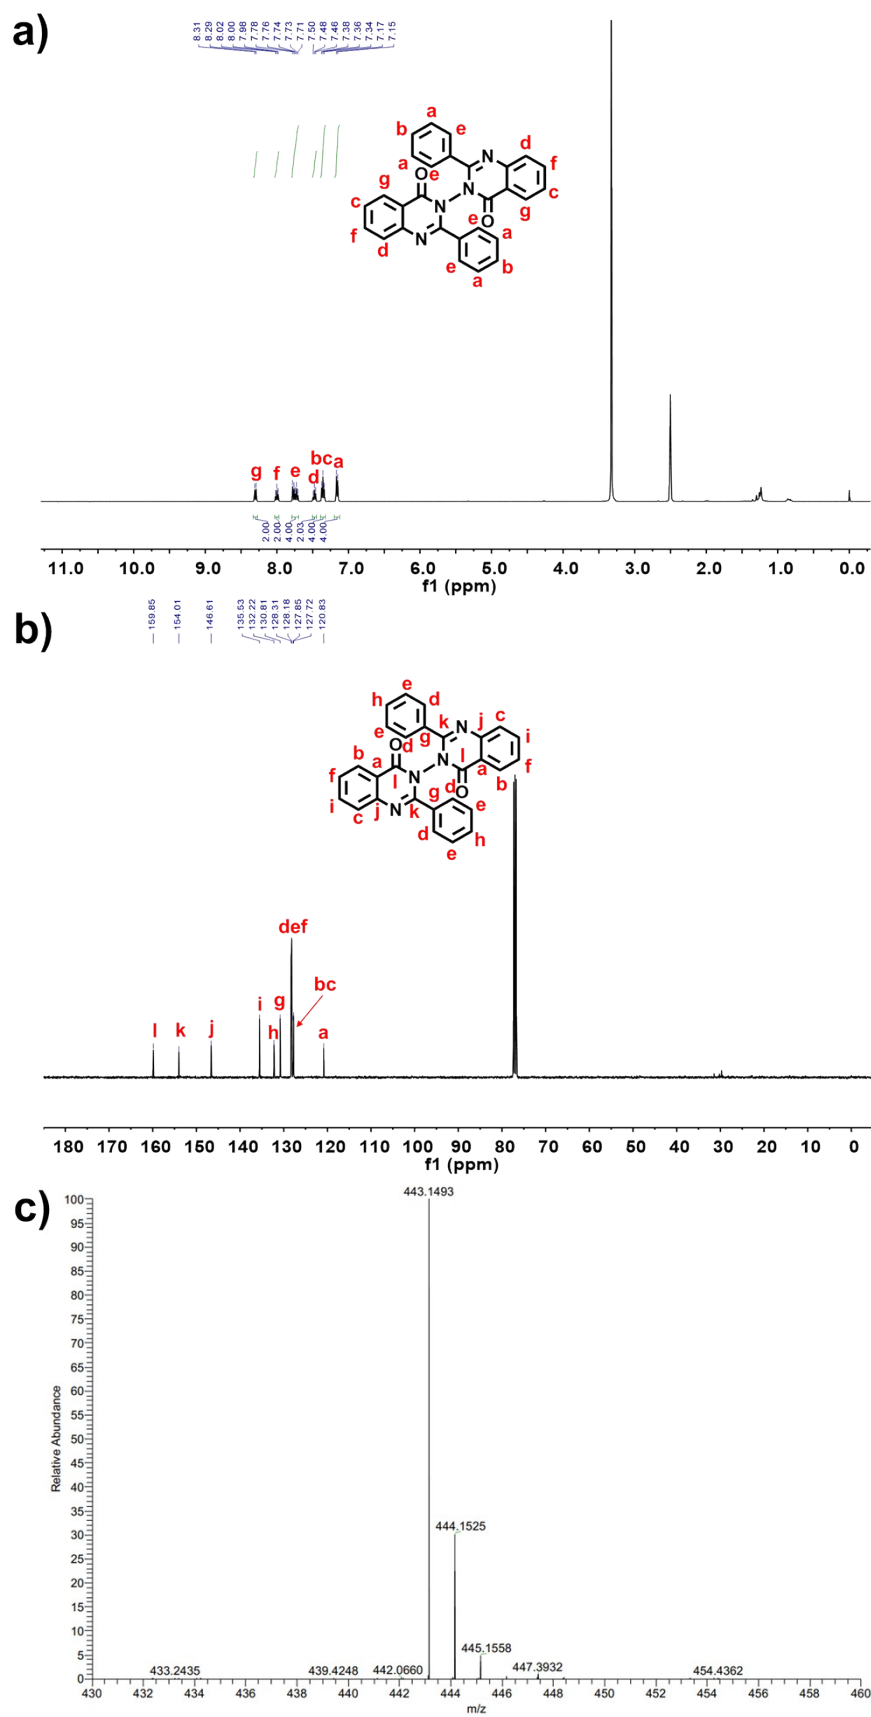

**Fig. S2** a)  $^1\text{H}$  NMR, b)  $^{13}\text{C}$  NMR, c) HRMS spectra of the model compound. HRMS (ESI):  $m/z$   $[\text{M}+\text{H}]^+$  calcd for  $\text{C}_{28}\text{H}_{18}\text{N}_4\text{O}_2$  443.1503; found, 443.1493.

**Table S1** Crystal data and structure refinement for AABH.

|                                                              |                                                                              |
|--------------------------------------------------------------|------------------------------------------------------------------------------|
| Identification code                                          | CCDC 2544533                                                                 |
| Empirical formula                                            | C7H7N2O                                                                      |
| Formula weight                                               | 135.15                                                                       |
| Temperature/K                                                | 294.76(11)                                                                   |
| Crystal system                                               | monoclinic                                                                   |
| Space group                                                  | P <sub>21/c</sub>                                                            |
| <i>a</i> /Å                                                  | 12.926(3)                                                                    |
| <i>b</i> /Å                                                  | 5.3094(11)                                                                   |
| <i>c</i> /Å                                                  | 9.688(2)                                                                     |
| <i>α</i> /°                                                  | 90                                                                           |
| <i>β</i> /°                                                  | 111.73(3)                                                                    |
| <i>γ</i> /°                                                  | 90                                                                           |
| Volume/Å <sup>3</sup>                                        | 617.7(3)                                                                     |
| Z                                                            | 4                                                                            |
| $\rho_{\text{calc}}/\text{cm}^3$                             | 1.453                                                                        |
| $\mu/\text{mm}^{-1}$                                         | 0.101                                                                        |
| F(000)                                                       | 284.0                                                                        |
| Crystal size/mm <sup>3</sup>                                 | 0.12 × 0.1 × 0.05                                                            |
| Radiation                                                    | Mo K $\alpha$ ( $\lambda$ = 0.71073)                                         |
| 2 $\theta$ range for data collection/°                       | 8.394 to 58.794                                                              |
| Index ranges                                                 | -17 ≤ <i>h</i> ≤ 17, -4 ≤ <i>k</i> ≤ 6, -13 ≤ <i>l</i> ≤ 13                  |
| Reflections collected                                        | 4402                                                                         |
| Independent reflections                                      | 1492 [ <i>R</i> <sub>int</sub> = 0.0295, <i>R</i> <sub>sigma</sub> = 0.0420] |
| Data/restraints/parameters                                   | 1492/0/99                                                                    |
| Goodness-of-fit on <i>F</i> <sup>2</sup>                     | 0.858                                                                        |
| Final <i>R</i> indexes [ <i>I</i> ≥ 2 $\sigma$ ( <i>I</i> )] | <i>R</i> <sub>1</sub> = 0.0530, <i>wR</i> <sub>2</sub> = 0.1487              |
| Final <i>R</i> indexes [all data]                            | <i>R</i> <sub>1</sub> = 0.0824, <i>wR</i> <sub>2</sub> = 0.1874              |
| Largest diff. peak/hole / e Å <sup>-3</sup>                  | 0.22/-0.27                                                                   |

**Table S2** Crystal data and structure refinement for model compound.

|                                                       |                                                                              |
|-------------------------------------------------------|------------------------------------------------------------------------------|
| Identification code                                   | CCDC 2544364                                                                 |
| Empirical formula                                     | C <sub>28</sub> H <sub>18</sub> N <sub>4</sub> O <sub>2</sub>                |
| Formula weight                                        | 442.46                                                                       |
| Temperature/K                                         | 200.00(10)                                                                   |
| Crystal system                                        | orthorhombic                                                                 |
| Space group                                           | P <sub>bca</sub>                                                             |
| <i>a</i> /Å                                           | 16.0275(13)                                                                  |
| <i>b</i> /Å                                           | 14.7197(16)                                                                  |
| <i>c</i> /Å                                           | 18.5097(19)                                                                  |
| <i>α</i> /°                                           | 90                                                                           |
| <i>β</i> /°                                           | 90                                                                           |
| <i>γ</i> /°                                           | 90                                                                           |
| Volume/Å <sup>3</sup>                                 | 4366.8(7)                                                                    |
| Z                                                     | 8                                                                            |
| $\rho_{\text{calc}}$ /cm <sup>3</sup>                 | 1.346                                                                        |
| $\mu$ /mm <sup>-1</sup>                               | 0.087                                                                        |
| F(000)                                                | 1840.0                                                                       |
| Crystal size/mm <sup>3</sup>                          | 0.22 × 0.15 × 0.1                                                            |
| Radiation                                             | Mo K $\alpha$ ( $\lambda$ = 0.71073)                                         |
| 2 $\Theta$ range for data collection/°                | 6.726 to 58.802                                                              |
| Index ranges                                          | -20 ≤ <i>h</i> ≤ 20, -18 ≤ <i>k</i> ≤ 20, -25 ≤ <i>l</i> ≤ 25                |
| Reflections collected                                 | 36100                                                                        |
| Independent reflections                               | 5533 [ <i>R</i> <sub>int</sub> = 0.0836, <i>R</i> <sub>sigma</sub> = 0.0659] |
| Data/restraints/parameters                            | 5533/0/307                                                                   |
| Goodness-of-fit on F <sup>2</sup>                     | 1.032                                                                        |
| Final R indexes [ <i>I</i> ≥ 2 $\sigma$ ( <i>I</i> )] | <i>R</i> <sub>1</sub> = 0.0712, <i>wR</i> <sub>2</sub> = 0.1902              |
| Final R indexes [all data]                            | <i>R</i> <sub>1</sub> = 0.1512, <i>wR</i> <sub>2</sub> = 0.2517              |
| Largest diff. peak/hole / e Å <sup>-3</sup>           | 0.39/-0.29                                                                   |

### 3. Characterization of AABH-TFBT-COF

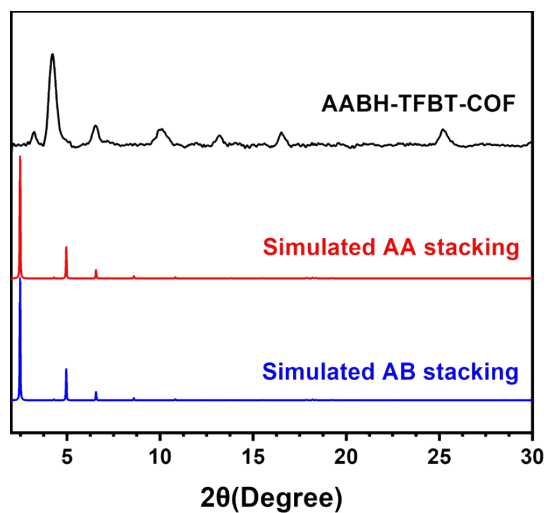

**Fig. S3.** The PXR D patterns of experimental data and simulated AA and AB stacking of **AABH-TFBT-COF**.

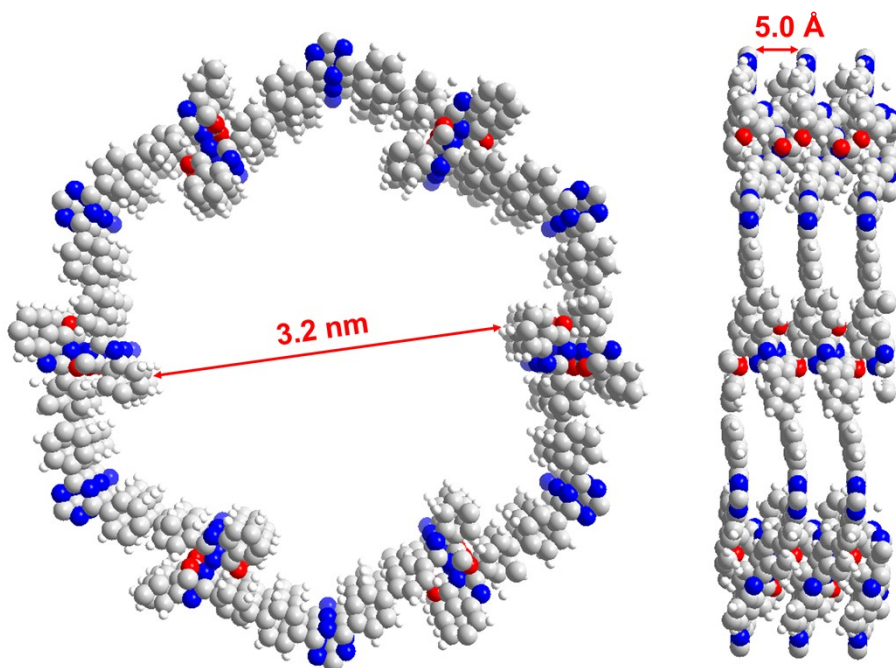

**Fig. S4.** The eclipsed structures of AA stacking mode for **AABH-TFBT-COF**.

**Table S3.** Fractional atomic coordinates for the unit cell of **AABH-TFBT-COF**.

**AABH-TFBT-COF** AA stacking mode, space group:  $P_3$

$a = 41.1629 \text{ \AA}$ ,  $b = 41.1629 \text{ \AA}$ ,  $c = 5.0134 \text{ \AA}$

| Atom | x/a     | y/b      | z/c      | Atom | x/a      | y/b      | z/c      |
|------|---------|----------|----------|------|----------|----------|----------|
| C1   | 1.27635 | -0.54113 | 0.03791  | C38  | -0.92129 | -0.48979 | -0.92129 |
| C2   | 1.26083 | -0.57904 | -0.02587 | C39  | -0.89607 | -0.48661 | -0.89607 |
| C3   | 1.23068 | -0.60656 | 0.12204  | C40  | -0.85824 | -0.42543 | -0.85824 |
| C4   | 1.2175  | -0.59588 | 0.34251  | C41  | -0.84477 | -0.36579 | -0.84477 |

|     |         |          |          |     |          |          |          |
|-----|---------|----------|----------|-----|----------|----------|----------|
| C5  | 1.23261 | -0.55783 | 0.4045   | C42 | -0.86954 | -0.38209 | -0.86954 |
| C6  | 1.26206 | -0.53009 | 0.25199  | C43 | -0.90735 | -0.44373 | -0.90735 |
| C7  | 1.26661 | -0.43762 | 0.40209  | C44 | -0.80576 | -0.27002 | -0.80576 |
| C8  | 1.25266 | -0.47603 | 0.36604  | C45 | -0.79009 | -0.08571 | -0.79009 |
| C9  | 1.27709 | -0.48971 | 0.30983  | C46 | -0.75399 | 0.01357  | -0.75399 |
| C10 | 1.31584 | -0.46433 | 0.29876  | C47 | -0.73271 | -0.06876 | -0.73271 |
| C11 | 1.32983 | -0.42596 | 0.33627  | C48 | -0.74835 | -0.25065 | -0.74835 |
| C12 | 1.30533 | -0.41206 | 0.38401  | C49 | -0.78444 | -0.35219 | -0.78444 |
| C13 | 1.31992 | -0.37108 | 0.40173  | C50 | -0.69471 | 0.0388   | -0.69471 |
| N14 | 1.35747 | -0.34664 | 0.40114  | H51 | -0.52042 | -0.08563 | -0.52042 |
| C15 | 1.21298 | -0.75827 | -0.36983 | H52 | -0.5869  | -0.19578 | -0.5869  |
| C16 | 1.24208 | -0.74292 | -0.18309 | H53 | -0.6171  | 0.45786  | -0.6171  |
| C17 | 1.2494  | -0.71076 | -0.04085 | H54 | -0.54983 | 0.57141  | -0.54983 |
| C18 | 1.22749 | -0.69404 | -0.08517 | H55 | -0.42792 | 0.43941  | -0.42792 |
| C19 | 1.19877 | -0.70884 | -0.27515 | H56 | -0.49491 | 0.37359  | -0.49491 |
| C20 | 1.1912  | -0.74145 | -0.41515 | H57 | -0.47416 | 0.25933  | -0.47416 |
| C21 | 1.17566 | -0.69069 | -0.30094 | H58 | -0.40713 | 0.32179  | -0.40713 |
| N22 | 1.17885 | -0.66493 | -0.11273 | H59 | -0.78341 | -0.47785 | -0.78341 |
| N23 | 1.14688 | -0.66188 | -0.04214 | H60 | -0.756   | -0.14806 | -0.756   |
| C24 | 1.14964 | -0.62722 | -0.017   | H61 | -0.69891 | 0.10365  | -0.69891 |
| C25 | 1.12465 | -0.62238 | 0.16871  | H62 | -0.75459 | -0.55281 | -0.75459 |
| C26 | 1.13135 | -0.58691 | 0.25054  | H63 | -0.56156 | 0.17045  | -0.56156 |
| C27 | 1.10819 | -0.58418 | 0.44266  | H64 | -0.55688 | 0.50809  | -0.55688 |
| C28 | 1.0783  | -0.61668 | 0.55187  | H65 | -0.61449 | 0.70116  | -0.61449 |
| C29 | 1.07142 | -0.65199 | 0.46849  | H66 | -0.67704 | 0.55269  | -0.67704 |
| C30 | 1.09481 | -0.65476 | 0.27844  | H67 | -0.90572 | -0.52398 | -0.90572 |
| N31 | 1.23572 | -0.66035 | 0.05115  | H68 | -0.83961 | -0.41979 | -0.83961 |
| O32 | 1.15276 | -0.69966 | -0.47956 | H69 | -0.86006 | -0.33547 | -0.86006 |
| O33 | 1.17324 | -0.60032 | -0.14052 | H70 | -0.92591 | -0.44495 | -0.92591 |
| N34 | 1.08786 | -0.69063 | 0.18882  | H71 | -0.80591 | -0.01521 | -0.80591 |
| C35 | 1.21378 | -0.64607 | 0.04009  | H72 | -0.74225 | 0.14857  | -0.74225 |
| N36 | 1.03748 | -0.97607 | -0.51828 | H73 | -0.73247 | -0.31536 | -0.73247 |
| C37 | 1.01367 | -0.9622  | -0.5192  | H74 | -0.79564 | -0.49536 | -0.79564 |

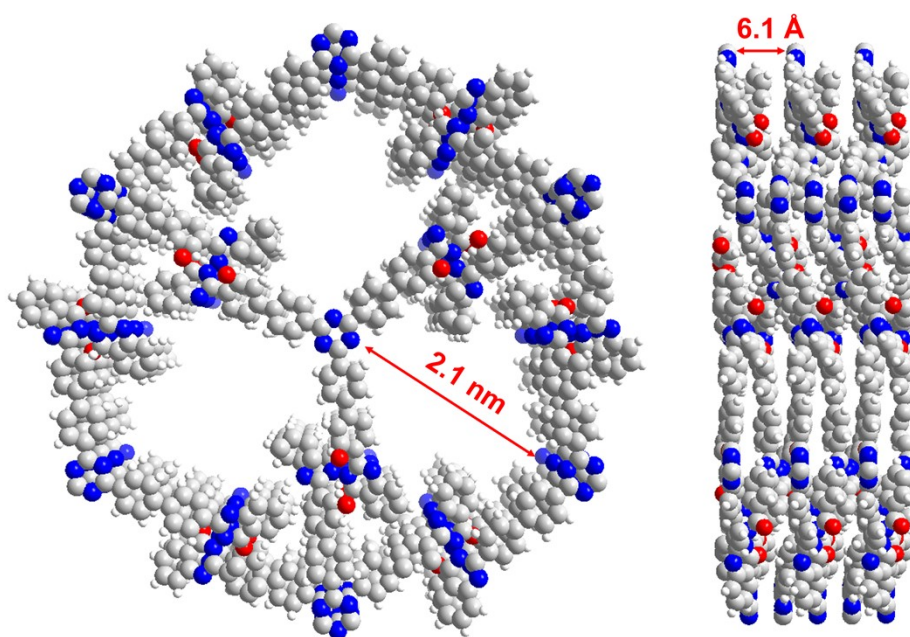

**Fig. S5.** The staggered structures of AB stacking mode for **AABH-TFBT-COF**.

**Table S4.** Fractional atomic coordinates for the unit cell of **AABH-TFBT-COF**.

**AABH-TFBT-COF** AB stacking mode, space group:  $P_{63}$

$a = 41.1340 \text{ \AA}$ ,  $b = 41.1340 \text{ \AA}$ ,  $c = 6.1221 \text{ \AA}$

| Atom | x/a     | y/b      | z/c      | Atom | x/a     | y/b      | z/c      |
|------|---------|----------|----------|------|---------|----------|----------|
| C1   | 1.28325 | -0.54653 | -0.03412 | C38  | 1.03091 | -0.92071 | 0.31597  |
| C2   | 1.27008 | -0.58504 | -0.04574 | C39  | 1.06994 | -0.89647 | 0.30021  |
| C3   | 1.23349 | -0.61129 | 0.02145  | C40  | 1.08476 | -0.85811 | 0.26045  |
| C4   | 1.21048 | -0.59794 | 0.10452  | C41  | 1.06084 | -0.84316 | 0.23499  |
| C5   | 1.22354 | -0.5592  | 0.11315  | C42  | 1.02197 | -0.86707 | 0.26099  |
| C6   | 1.26025 | -0.53294 | 0.04589  | C43  | 1.0072  | -0.90535 | 0.30082  |
| C7   | 1.26559 | -0.43758 | 0.02092  | C44  | 1.07592 | -0.80351 | 0.16591  |
| C8   | 1.2514  | -0.47648 | 0.01455  | C45  | 1.10926 | -0.77419 | 0.25534  |
| C9   | 1.2748  | -0.49157 | 0.05847  | C46  | 1.12349 | -0.73703 | 0.18429  |
| C10  | 1.31265 | -0.46664 | 0.11117  | C47  | 1.10517 | -0.72888 | 0.01771  |
| C11  | 1.32689 | -0.42782 | 0.11539  | C48  | 1.07176 | -0.75821 | -0.0697  |
| C12  | 1.30362 | -0.41272 | 0.06959  | C49  | 1.05731 | -0.79499 | 0.00312  |
| C13  | 1.31909 | -0.37132 | 0.07098  | C50  | 1.12004 | -0.69052 | -0.07287 |
| N14  | 1.35687 | -0.34744 | 0.07088  | H51  | 1.31132 | -0.52739 | -0.0925  |
| C15  | 1.22812 | -0.77032 | -0.09629 | H52  | 1.28842 | -0.59443 | -0.11207 |
| C16  | 1.25914 | -0.74516 | 0.02789  | H53  | 1.18232 | -0.61741 | 0.16026  |
| C17  | 1.26414 | -0.70989 | 0.08132  | H54  | 1.20503 | -0.54971 | 0.17403  |
| C18  | 1.2382  | -0.69965 | 0.00941  | H55  | 1.24685 | -0.42696 | -0.01606 |
| C19  | 1.20744 | -0.72451 | -0.11757 | H56  | 1.22226 | -0.49464 | -0.02947 |
| C20  | 1.20225 | -0.7601  | -0.16958 | H57  | 1.33139 | -0.47713 | 0.15086  |
| C21  | 1.18131 | -0.71196 | -0.1897  | H58  | 1.3562  | -0.40963 | 0.15591  |
| N22  | 1.18596 | -0.67813 | -0.11719 | H59  | 1.22422 | -0.79768 | -0.13609 |

|     |         |          |          |     |         |          |          |
|-----|---------|----------|----------|-----|---------|----------|----------|
| N23 | 1.15792 | -0.6687  | -0.16276 | H60 | 1.27943 | -0.75287 | 0.08178  |
| C24 | 1.16609 | -0.63896 | -0.29969 | H61 | 1.28829 | -0.69047 | 0.17662  |
| C25 | 1.13971 | -0.62468 | -0.31648 | H62 | 1.17842 | -0.7798  | -0.26617 |
| C26 | 1.14872 | -0.59124 | -0.42581 | H63 | 1.176   | -0.57445 | -0.49945 |
| C27 | 1.12254 | -0.57904 | -0.43614 | H64 | 1.12949 | -0.55329 | -0.52105 |
| C28 | 1.08748 | -0.6     | -0.33594 | H65 | 1.06721 | -0.59057 | -0.34442 |
| C29 | 1.07868 | -0.633   | -0.22355 | H66 | 1.05156 | -0.6491  | -0.14557 |
| C30 | 1.10496 | -0.64508 | -0.21211 | H67 | 1.08907 | -0.90731 | 0.31077  |
| N31 | 1.24417 | -0.66294 | 0.05441  | H68 | 1.11481 | -0.84048 | 0.23976  |
| O32 | 1.15538 | -0.73174 | -0.31122 | H69 | 1.00285 | -0.85628 | 0.24588  |
| O33 | 1.19534 | -0.62404 | -0.40338 | H70 | 0.97702 | -0.92307 | 0.31284  |
| N34 | 1.09603 | -0.67895 | -0.09925 | H71 | 1.12415 | -0.78013 | 0.38029  |
| C35 | 1.22054 | -0.65207 | -0.00266 | H72 | 1.149   | -0.71483 | 0.25651  |
| N36 | 1.03769 | -0.97701 | 0.33248  | H73 | 1.05721 | -0.75278 | -0.19916 |
| C37 | 1.01484 | -0.96197 | 0.33316  | H74 | 1.03199 | -0.81697 | -0.07225 |

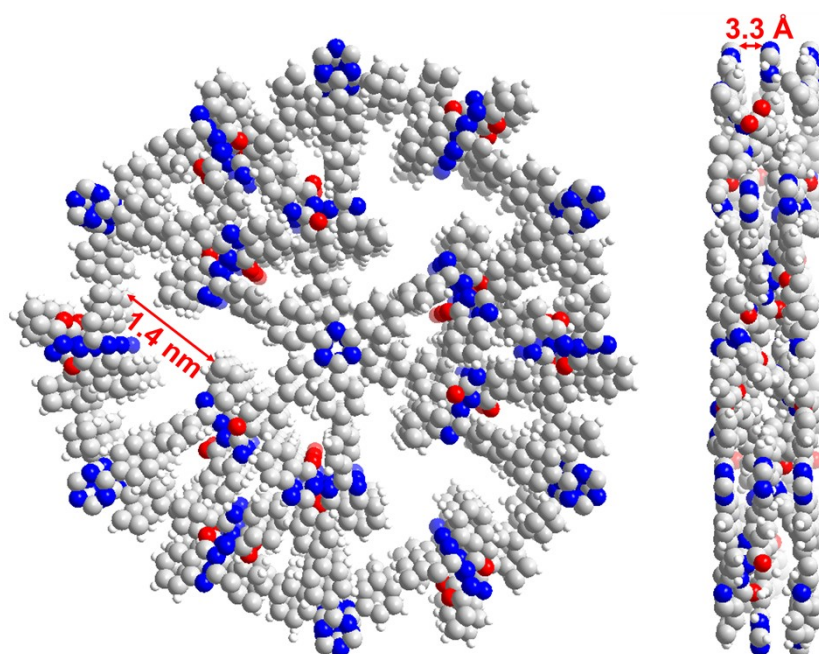

**Fig. S6.** The staggered structures of ABC stacking mode for **AABH-TFBT-COF**.

**Table S5.** Fractional atomic coordinates for the unit cell of **AABH-TFBT-COF**

**AABH-TFBT-COF** ABC stacking mode, space group:  $R_3$

$a = 41.2891 \text{ \AA}$ ,  $b = 41.2891 \text{ \AA}$ ,  $c = 6.6283 \text{ \AA}$

$\alpha = \beta = 90.0000^\circ$ ,  $\gamma = 120.0000^\circ$ ,  $R_{wp} = 6.33 \%$  and  $R_p = 4.17 \%$

| Atom | x/a     | y/b      | z/c      | Atom | x/a     | y/b      | z/c     |
|------|---------|----------|----------|------|---------|----------|---------|
| C1   | 1.25476 | -0.54255 | -0.07933 | C38  | 1.02413 | -0.92279 | 0.05481 |
| C2   | 1.23716 | -0.57996 | -0.13918 | C39  | 1.06189 | -0.89613 | 0.02109 |
| C3   | 1.20749 | -0.60782 | -0.02657 | C40  | 1.07363 | -0.85785 | 0.01537 |

|     |         |          |          |     |         |          |          |
|-----|---------|----------|----------|-----|---------|----------|----------|
| C4  | 1.19625 | -0.5975  | 0.15095  | C41 | 1.04796 | -0.84523 | 0.04569  |
| C5  | 1.21373 | -0.55972 | 0.21029  | C42 | 1.0102  | -0.87217 | 0.08095  |
| C6  | 1.24329 | -0.53181 | 0.09557  | C43 | 0.99843 | -0.91038 | 0.08329  |
| C7  | 1.25884 | -0.43576 | 0.24135  | C44 | 1.0602  | -0.80438 | 0.04072  |
| C8  | 1.24121 | -0.47456 | 0.21072  | C45 | 1.09583 | -0.77701 | 0.11037  |
| C9  | 1.26209 | -0.49145 | 0.15291  | C46 | 1.10633 | -0.73895 | 0.11259  |
| C10 | 1.30117 | -0.46888 | 0.13626  | C47 | 1.08156 | -0.72743 | 0.04339  |
| C11 | 1.3188  | -0.43026 | 0.16885  | C48 | 1.04619 | -0.75457 | -0.02662 |
| C12 | 1.29781 | -0.41302 | 0.21719  | C49 | 1.03583 | -0.79238 | -0.03066 |
| C13 | 1.31631 | -0.3715  | 0.23083  | C50 | 1.09176 | -0.6874  | 0.03967  |
| N14 | 1.3543  | -0.35018 | 0.2303   | H51 | 1.27696 | -0.5218  | -0.17286 |
| C15 | 1.17187 | -0.7639  | -0.4447  | H52 | 1.24631 | -0.58714 | -0.27677 |
| C16 | 1.20829 | -0.74491 | -0.36763 | H53 | 1.1738  | -0.61853 | 0.24205  |
| C17 | 1.22132 | -0.71074 | -0.26778 | H54 | 1.20444 | -0.55236 | 0.34663  |
| C18 | 1.1979  | -0.69553 | -0.24524 | H55 | 1.24179 | -0.42347 | 0.27894  |
| C19 | 1.16179 | -0.71404 | -0.32662 | H56 | 1.21106 | -0.49109 | 0.2236   |
| C20 | 1.14854 | -0.74861 | -0.42363 | H57 | 1.31814 | -0.48107 | 0.09476  |
| C21 | 1.13822 | -0.69708 | -0.29431 | H58 | 1.34883 | -0.41378 | 0.14979  |
| N22 | 1.14993 | -0.66756 | -0.16209 | H59 | 1.16167 | -0.79056 | -0.51965 |
| N23 | 1.12329 | -0.65939 | -0.07813 | H60 | 1.22632 | -0.75679 | -0.38413 |
| C24 | 1.12598 | -0.62527 | -0.11496 | H61 | 1.24943 | -0.69627 | -0.20722 |
| C25 | 1.10228 | -0.61445 | -0.00072 | H62 | 1.12012 | -0.76394 | -0.47913 |
| C26 | 1.10797 | -0.57797 | -0.00414 | H63 | 1.13069 | -0.55625 | -0.09053 |
| C27 | 1.08435 | -0.56941 | 0.10622  | H64 | 1.08866 | -0.54131 | 0.10326  |
| C28 | 1.05501 | -0.59718 | 0.21928  | H65 | 1.03629 | -0.59073 | 0.30155  |
| C29 | 1.04999 | -0.63324 | 0.22752  | H66 | 1.02749 | -0.65445 | 0.31687  |
| C30 | 1.07382 | -0.6418  | 0.119    | H67 | 1.08232 | -0.90491 | -0.00269 |
| N31 | 1.21093 | -0.66061 | -0.14316 | H68 | 1.10277 | -0.83823 | -0.01557 |
| O32 | 1.10799 | -0.70993 | -0.37858 | H69 | 0.9896  | -0.86384 | 0.10978  |
| O33 | 1.14788 | -0.60407 | -0.24096 | H70 | 0.96915 | -0.93024 | 0.10985  |
| N34 | 1.06893 | -0.67862 | 0.12737  | H71 | 1.11541 | -0.78501 | 0.16692  |
| C35 | 1.18917 | -0.64704 | -0.10123 | H72 | 1.13371 | -0.71855 | 0.16853  |
| N36 | 1.03291 | -0.9774  | 0.06099  | H73 | 1.02643 | -0.74649 | -0.07874 |
| C37 | 1.01149 | -0.96333 | 0.06114  | H74 | 1.00858 | -0.81217 | -0.09046 |

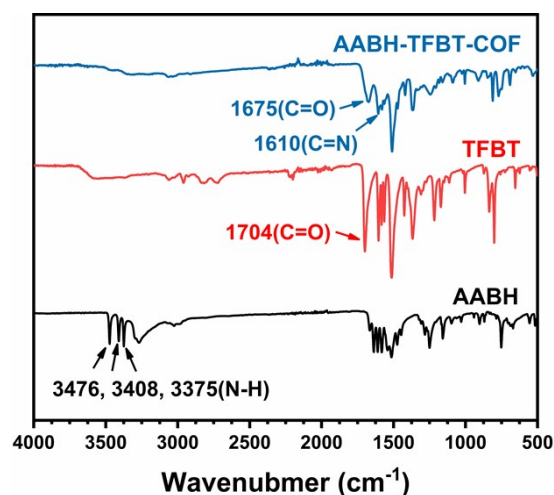

**Fig. S7.** FTIR spectra of **AABH-TFBT-COF** and monomers.

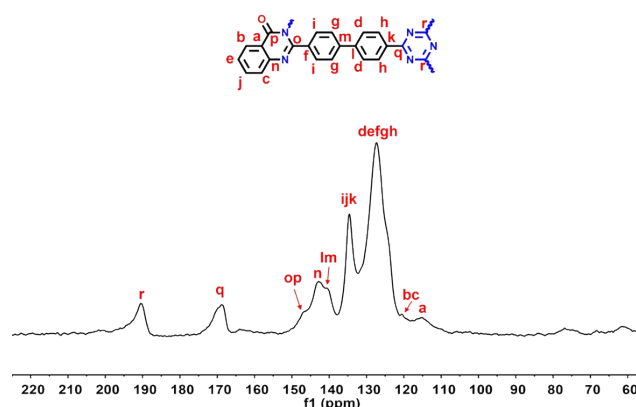

**Fig. S8.**  $^{13}\text{C}$  CP-MAS solid-state NMR spectrum of **AABH-TFBT-COF**.

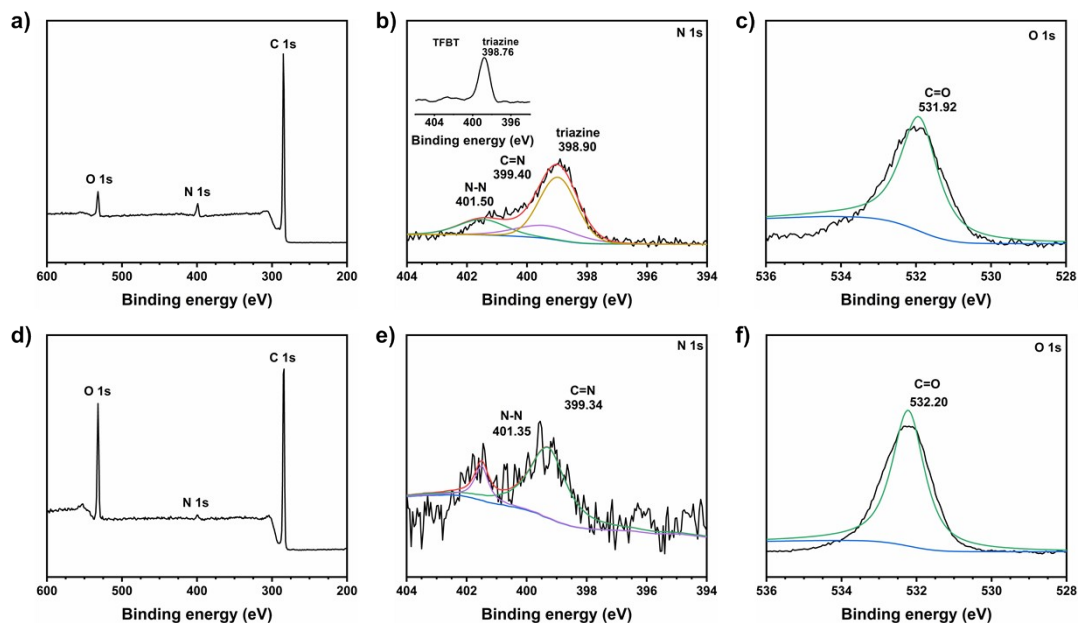

**Fig. S9.** XPS spectra of **AABH-TFBT-COF** (a-c) and the model compound (d-f). (a, d) Survey scans. (b) N 1s of the COF: triazine N (398.90 eV, inset: TFBT monomer), C=N (399.40 eV), N-N (401.50 eV). (e) N 1s of the model compound: C=N (399.34 eV), N-N (401.35 eV). (c, f) O 1s (C=O). The consistent N-N peak positions confirm the preservation of the heterocycle-embedded N-N linkage in the COF.

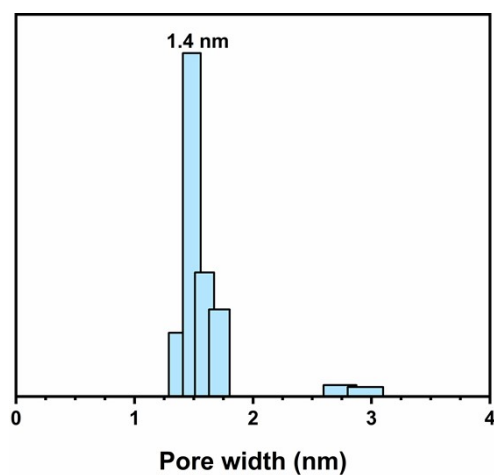

**Fig. S10.** The pore size distribution of **AABH-TFBT-COF**

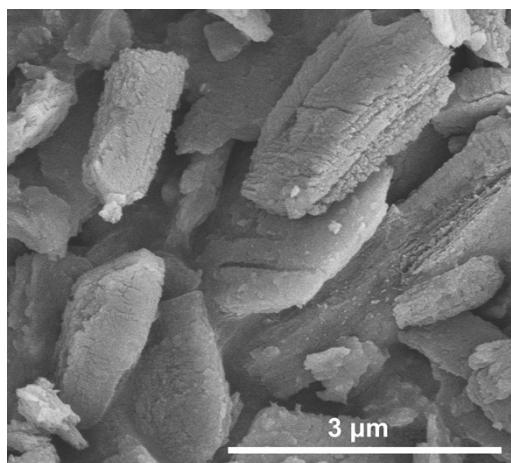

**Fig. S11.** SEM image of **AABH-TFBT-COF**.

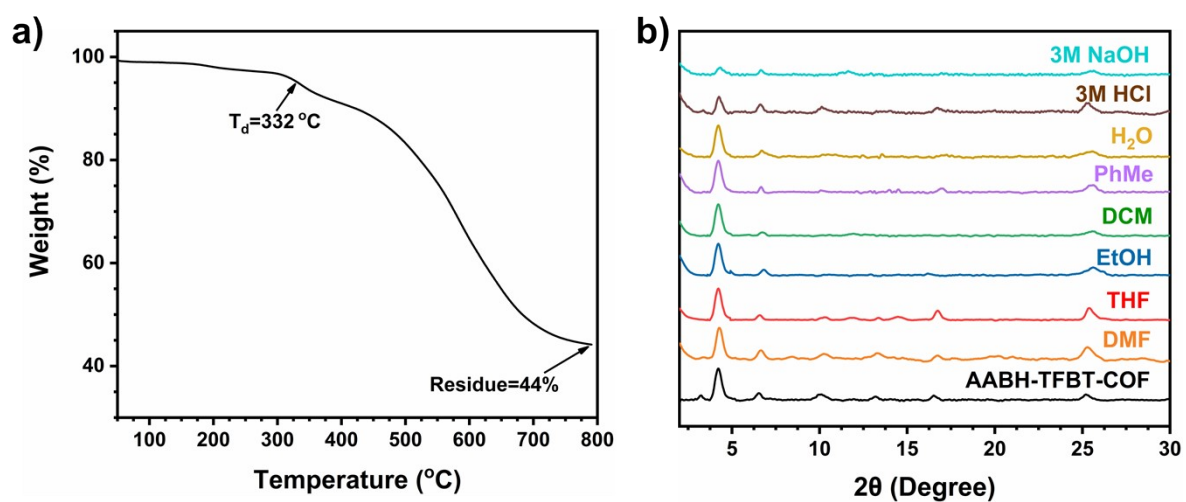

**Fig. S12.** a) TGA curve of **AABH-TFBT-COF**. b) PXRD patterns of **AABH-TFBT-COF** after soaking in different media for 24 h.

## 4. Characterization of Pd@AABH-TFBT-COF

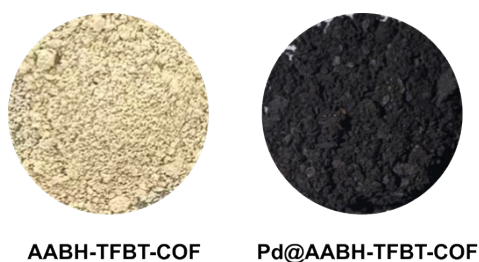

Fig. S13. Digital photograph of **AABH-TFBT-COF** and **Pd@AABH-TFBT-COF**.

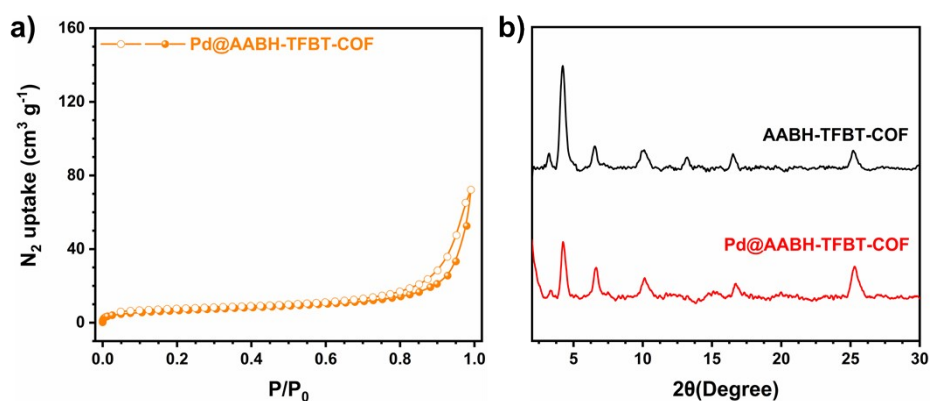

Fig. S14. a)  $N_2$  adsorption-desorption isotherm at 77 K of **Pd@AABH-TFBT-COF** and b) PXRD patterns of **AABH-TFBT-COF** and **Pd@AABH-TFBT-COF**

## 5. Pd@AABH-TFBT-COF- catalyzed model reaction

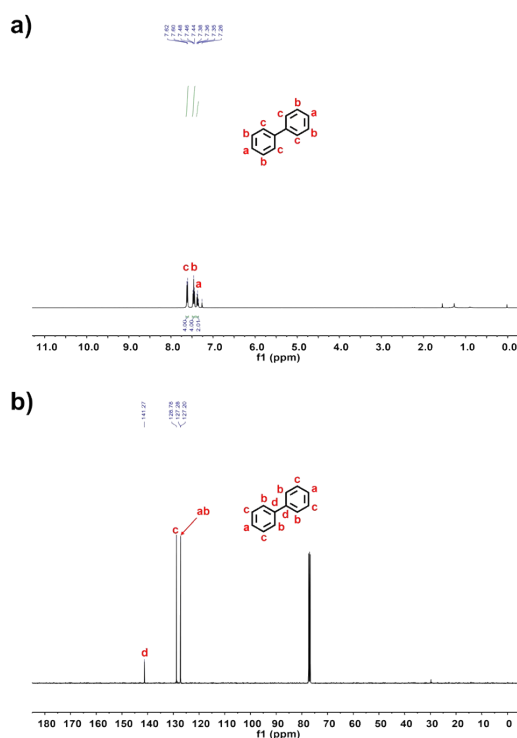

**Fig. S15.** Characterization of biphenyl. a)  $^1\text{H-NMR}$  (400 MHz,  $\text{CDCl}_3$ , ppm):  $\delta=7.62$  (m, 4H), 7.46 (m, 4H), 7.36 (m, 2H). b)  $^{13}\text{C-NMR}$  (100 MHz,  $\text{CDCl}_3$ , ppm):  $\delta=141.27$ , 128.78, 127.28, 127.20.

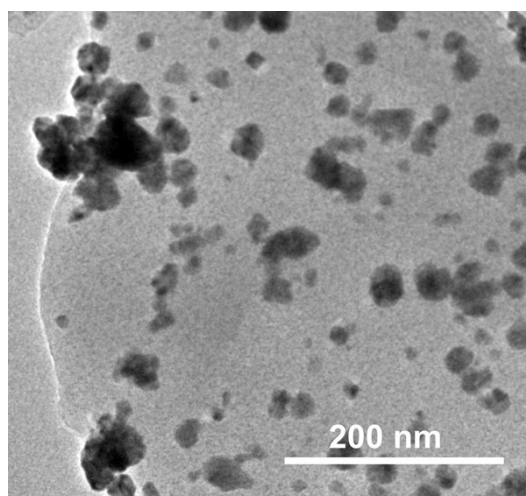

**Fig. S16.** HRTEM image of **Pd@AABH-TFBT-COF** obtained with hydrazine hydrate as the reductant instead of  $\text{NaBH}_4$ , showing large Pd NPs of  $\sim 35$  nm (see Section 1.5 for synthesis details). The corresponding catalytic activity is significantly lower (68 % yield, Table S6, entry 10), highlighting the importance of small Pd NPs for high performance.

**Table S6.** Optimization of reaction conditions for Suzuki-Miyaura coupling reaction catalyzed by **Pd@AABH-TFBT-COF**<sup>a</sup>

| Entry           | Base                    | Solvent                       | Pd (%) | T (°C) | t (h) | Yield (%) <sup>b</sup> |
|-----------------|-------------------------|-------------------------------|--------|--------|-------|------------------------|
| 1               | $\text{K}_2\text{CO}_3$ | DMF/ $\text{H}_2\text{O}$     | 0.5    | 50     | 5     | 99                     |
| 2               | $\text{K}_2\text{CO}_3$ | DMF                           | 0.5    | 50     | 5     | 55                     |
| 3               | $\text{K}_2\text{CO}_3$ | $\text{H}_2\text{O}$          | 0.5    | 50     | 5     | 14                     |
| 4               | $\text{K}_2\text{CO}_3$ | Toluene                       | 0.5    | 50     | 5     | 68                     |
| 5               | $\text{K}_2\text{CO}_3$ | Toluene/ $\text{H}_2\text{O}$ | 0.5    | 50     | 5     | 27                     |
| 6               | $\text{K}_2\text{CO}_3$ | THF                           | 0.5    | 50     | 5     | 15                     |
| 7               | $\text{K}_2\text{CO}_3$ | THF/ $\text{H}_2\text{O}$     | 0.5    | 50     | 5     | 24                     |
| 8               | $\text{K}_2\text{CO}_3$ | Dioxane                       | 0.5    | 50     | 5     | 18                     |
| 9               | $\text{K}_2\text{CO}_3$ | Dioxane/ $\text{H}_2\text{O}$ | 0.5    | 50     | 5     | 17                     |
| 10 <sup>c</sup> | $\text{K}_2\text{CO}_3$ | DMF/ $\text{H}_2\text{O}$     | 0.5    | 50     | 5     | 68                     |

<sup>a</sup>Reaction conditions: phenyl boronic acid (1 mmol), aryl halide (1.1 mmol), **Pd@AABH-TFBT-COF** (3.3 mg, 0.5 mol% Pd loading),  $\text{K}_2\text{CO}_3$  (1.5 mmol), DMF/ $\text{H}_2\text{O}$  (1.5 mL/1.5 mL), 50 °C. <sup>b</sup>Isolated yield. <sup>c</sup>Catalysis by **Pd@AABH-TFBT-COF** with larger Pd NPs ( $\sim 35$  nm)

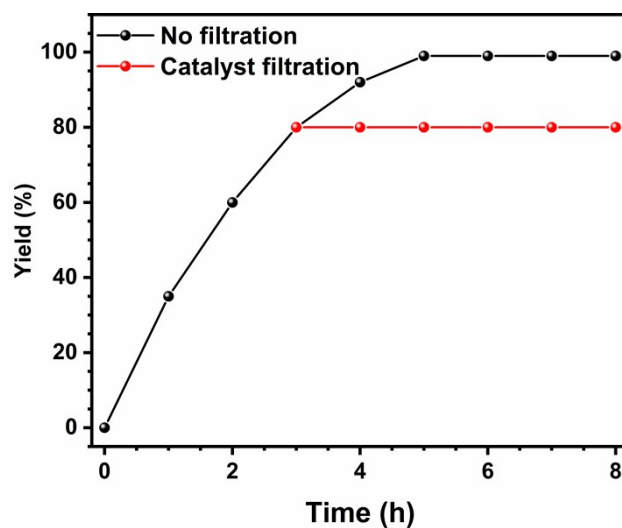

Fig. S17. Reaction time examination and leaching test for model reaction.

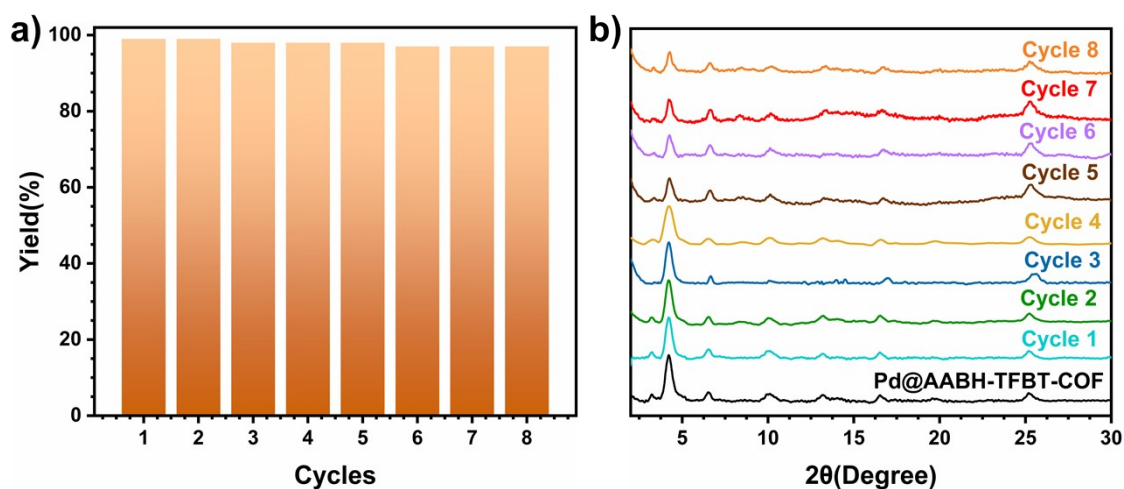

Fig. S18. a) Catalytic cycles for model reaction. b) PXR D patterns of Pd@AABH-TFBT-COF before and after eight cycles.

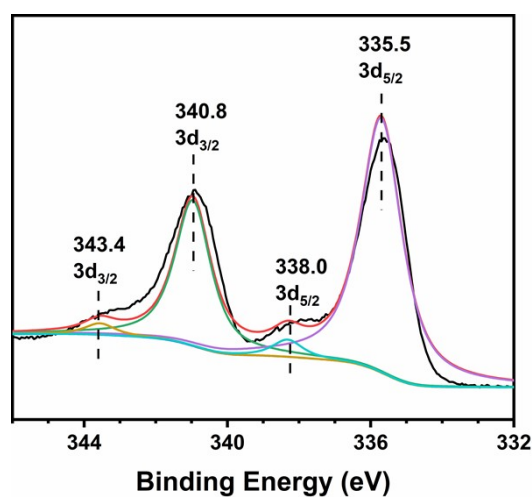

Fig. S19. Pd 3d XPS spectrum of the Pd@AABH-TFBT-COF catalyst after eight catalytic cycles.

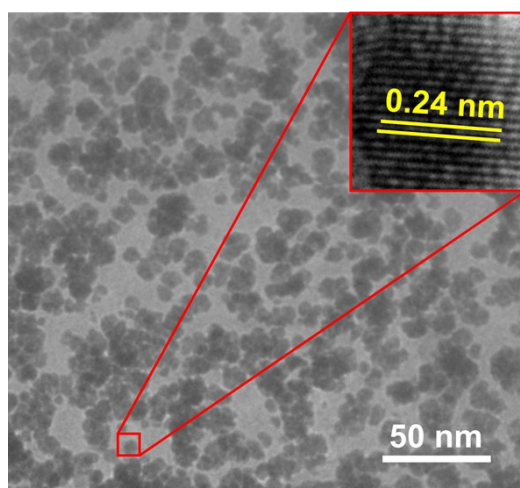

**Fig. S20.** HRTEM image of Pd@AABH-TFBT-COOH after eight catalytic cycles.

**Table S7.** Comparison with reported Pd@COFs catalysts in the Suzuki–Miyaura coupling of bromobenzene and phenylboronic acid.

| Entry | Catalyst                                    | Pd Valence       | T (°C) | Time (h) | Yield (%) | Recyclability (runs) | TON   | TOF (h <sup>-1</sup> ) | Ref. |
|-------|---------------------------------------------|------------------|--------|----------|-----------|----------------------|-------|------------------------|------|
| 1     | Pd@COF-TB                                   | Pd <sup>2+</sup> | 95     | 8        | 93        | 8                    | 211   | 26                     | [2]  |
| 2     | Pd@-COF-QA                                  | Pd <sup>0</sup>  | 50     | 6        | 99        | 10                   | 59    | 10                     | [3]  |
| 3     | 3D-Pd-NHC-COF                               | Pd <sup>2+</sup> | 120    | 24       | 92        | 5                    | 11.7  | 4.7                    | [4]  |
| 4     | Pd/COF-LZU-1                                | Pd <sup>2+</sup> | 150    | 3        | 97        | 4                    | 192   | 64                     | [5]  |
| 5     | Pd@MC-Tab-Dva COF                           | Pd <sup>2+</sup> | 150    | 2        | 99        | 4                    | 50    | 25                     | [6]  |
| 6     | ZnFe <sub>2</sub> O <sub>4</sub> @PDACOF@Pd | Pd <sup>0</sup>  | 50     | 1        | 99        | 5                    | 59    | 59                     | [7]  |
| 7     | Pd/Bth-Tp-COF                               | Pd <sup>2+</sup> | 100    | 0.3      | 99        | 5                    | 317   | 951                    | [8]  |
| 8     | Pd@TTA-DFB                                  | Pd <sup>2+</sup> | 150    | 2        | 97        | -                    | 194   | 97                     | [9]  |
| 9     | Pd(II)@SP-3D-COF-BPY                        | Pd <sup>2+</sup> | 70     | 2        | 98        | 4                    | 196   | 98                     | [10] |
| 10    | Pd/COF-SMC2                                 | Pd <sup>2+</sup> | 80     | 1        | 96        | 3                    | 192   | 192                    | [11] |
| 11    | CS/ZIF-8@COFa-4@Pd                          | Pd <sup>0</sup>  | 80     | 4        | 99        | 5                    | 18    | 4.5                    | [12] |
| 12    | Pd/COF-DB                                   | Pd <sup>2+</sup> | 80     | 0.5      | 99        | 4                    | 163.4 | 326.7                  | [13] |
| 13    | MCM@Pd@COF                                  | Pd <sup>0</sup>  | 90     | 2        | 97        | 8                    | 650   | 325                    | [14] |
| 14    | Pd-NP@Tfpa-Od                               | Pd <sup>0</sup>  | 90     | 24       | 99        | 3                    | 198   | 8.3                    | [15] |
| 15    | Pd@PDPP-TBP                                 | Pd <sup>0</sup>  | 40     | 2        | 99        | 5                    | 171   | 85                     | [16] |
| 16    | Pd@COF-TFP_TzPy                             | Pd <sup>2+</sup> | RT     | 3        | 91        | 4                    | 160   | 53                     | [17] |

|    |                             |                  |     |     |      |    |     |      |           |
|----|-----------------------------|------------------|-----|-----|------|----|-----|------|-----------|
| 17 | Pd/AntCOF                   | Pd <sup>0</sup>  | RT  | 12  | 97   | 4  | 24  | 2    | [18]      |
| 18 | TAPB-BTCA                   | Pd <sup>2+</sup> | 80  | 2   | 51   | -  | 102 | 51   | [19]      |
| 19 | PdNPs@UCOF-SH               | Pd <sup>0</sup>  | 80  | 2   | 99   | 8  | 132 | 66   | [20]      |
| 20 | Pd/DMTP-TPB                 | Pd <sup>2+</sup> | RT  | 1   | 99   | 3  | 99  | 99   | [21]      |
| 21 | Pd/H <sub>2</sub> P-Bph-COF | Pd <sup>2+</sup> | 110 | 1.5 | 97.5 | 4  | 195 | 130  | [22]      |
| 22 | Pd@TU-COF                   | Pd <sup>2+</sup> | RT  | 4   | 99   | 10 | 182 | 46   | [23]      |
| 23 | IHP-Br-Pd-NPs               | Pd <sup>0</sup>  | 100 | 6   | 100  | 9  | 27  | 4.6  | [24]      |
| 24 | Pd@AABH-TFBT-COF            | Pd <sup>0</sup>  | 50  | 5   | 99   | 8  | 198 | 39.6 | This work |

## 6. Scope of Pd@AABH-TFBT-COF-catalyzed Suzuki-Miyaura coupling reaction.

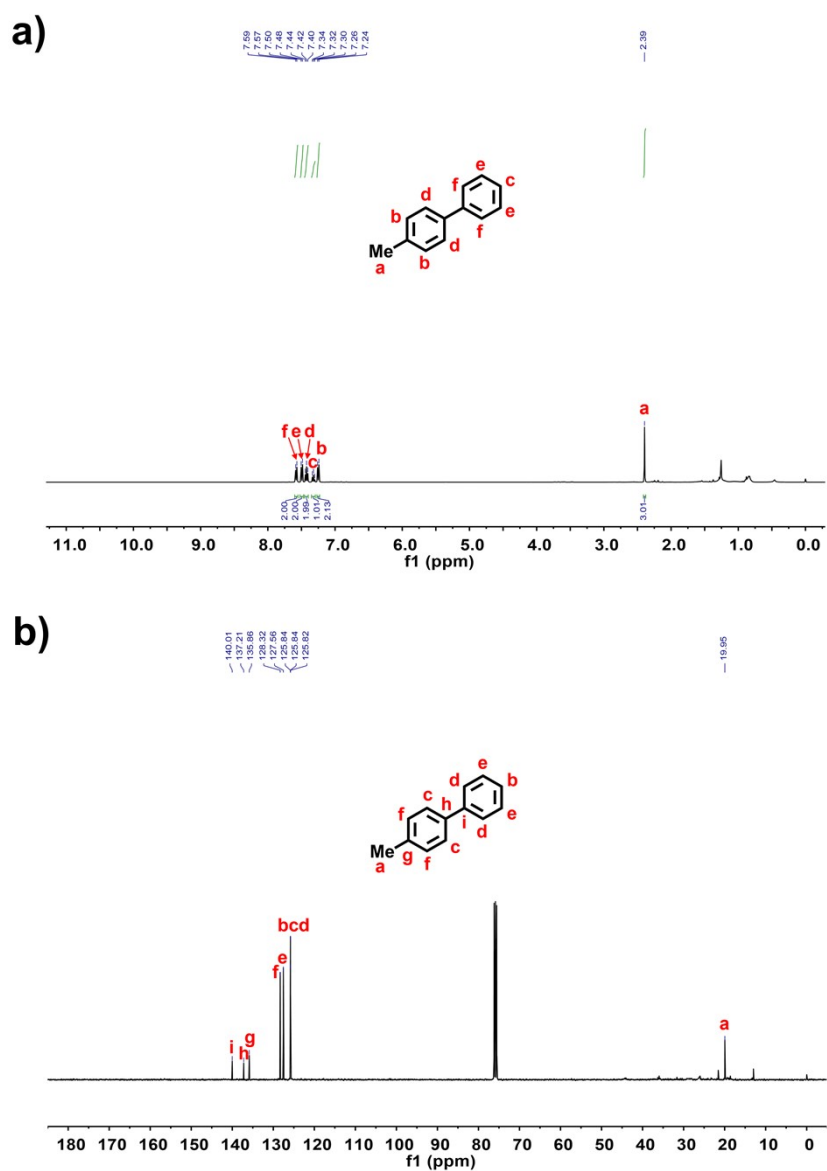

**Fig. S21.** Characterization of 4-phenyltoluene. a)  $^1\text{H-NMR}$  (400 MHz,  $\text{CDCl}_3$ , ppm):  $\delta=7.57$  (d,  $J=8$  Hz, 2H), 7.48 (d,  $J=8$  Hz, 2H), 7.42 (t,  $J=8$  Hz, 2H), 7.32 (t,  $J=8$  Hz, 2H), 7.24 (d,  $J=8$  Hz, 2H), 2.39 (s, 3H). b)  $^{13}\text{C-NMR}$  (100 MHz,  $\text{CDCl}_3$ , ppm):  $\delta=140.01$ , 137.21, 135.86, 128.32, 127.56, 125.84, 125.83, 125.82, 19.95.

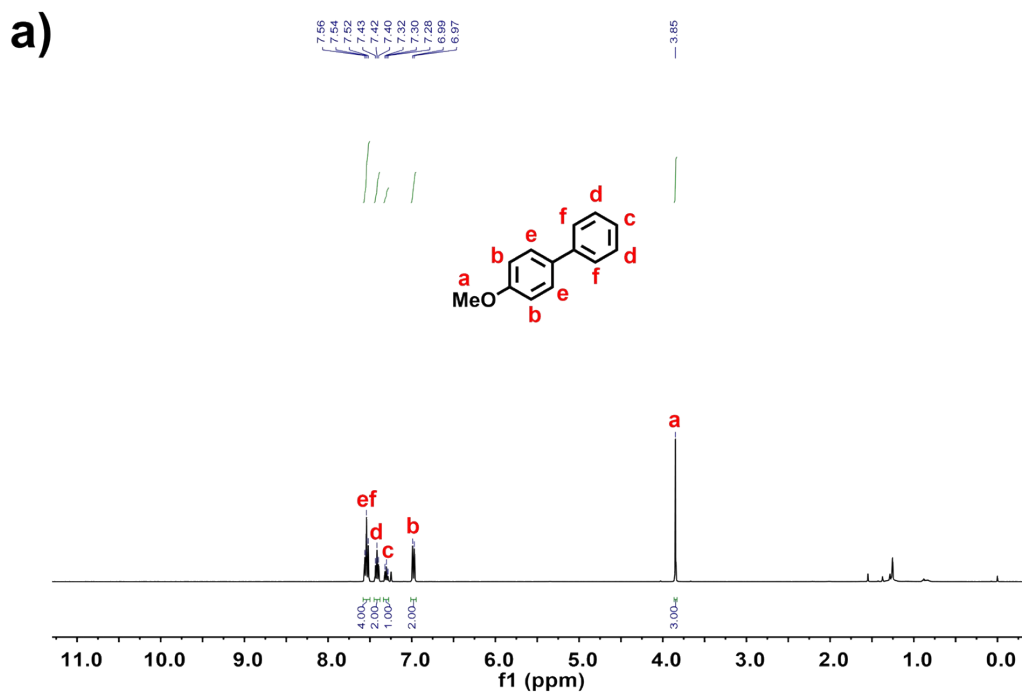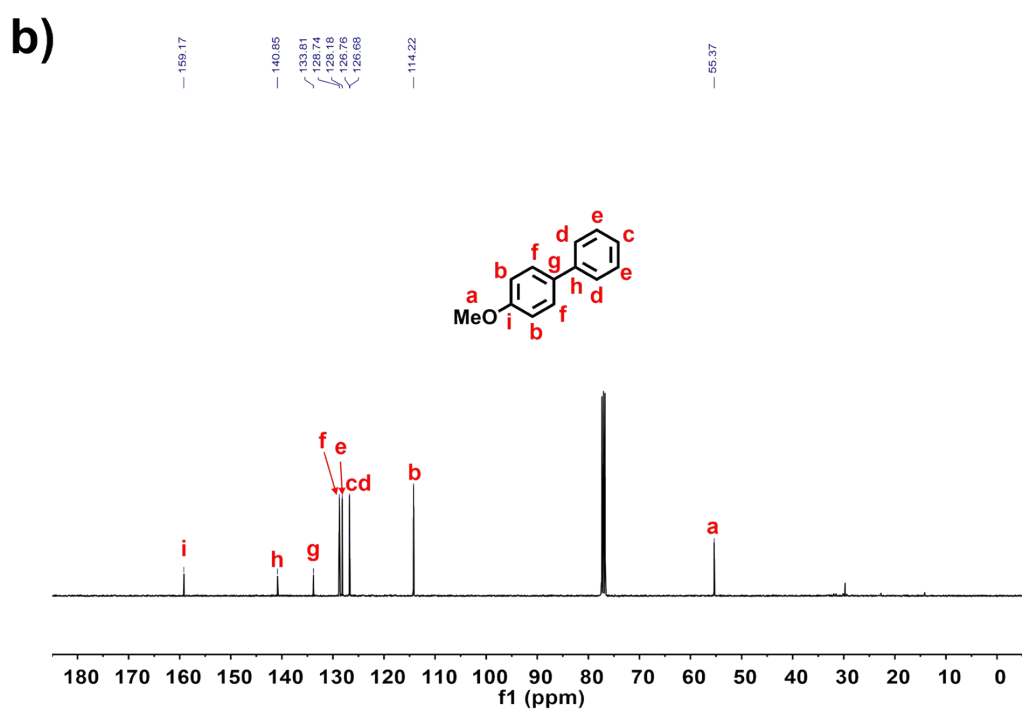

**Fig. S22.** Characterization of 4-methoxybiphenyl. a)  $^1\text{H-NMR}$  (400 MHz,  $\text{CDCl}_3$ , ppm):  $\delta$ =7.54 (t,  $J$ =8 Hz, 4H), 7.42 (t,  $J$ =8 Hz, 2H), 7.30 (t,  $J$ =8 Hz, 1H), 6.97 (d,  $J$ =8 Hz, 2H), 3.85 (s, 3H). b)  $^{13}\text{C-NMR}$  (100 MHz,  $\text{CDCl}_3$ , ppm):  $\delta$ =159.17, 140.85, 133.81, 128.74, 128.18, 126.78, 126.68, 114.22, 55.37.

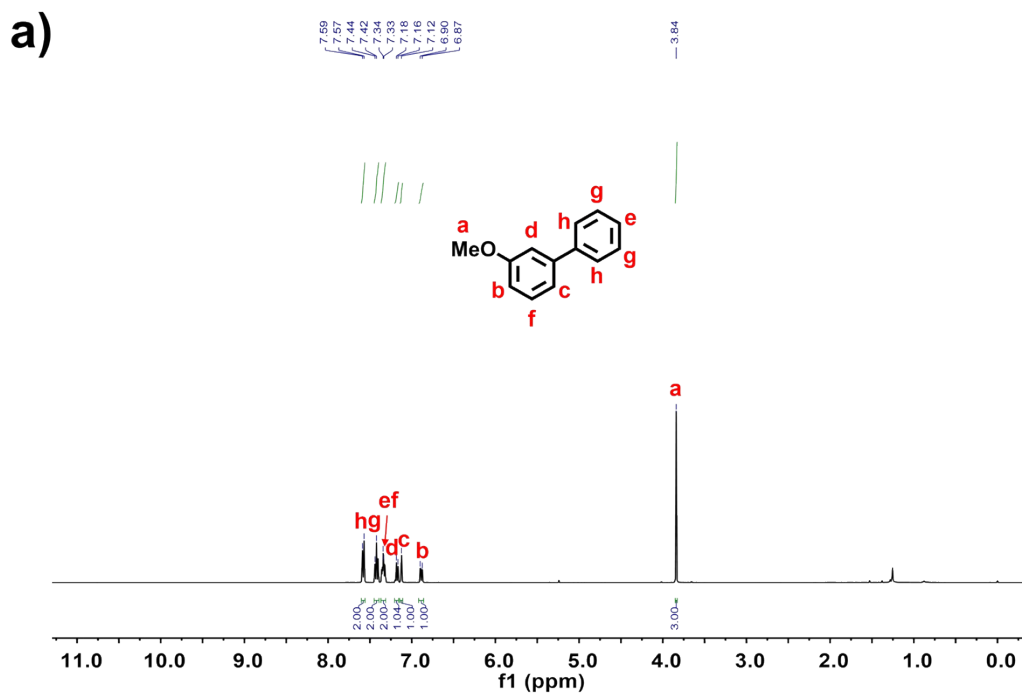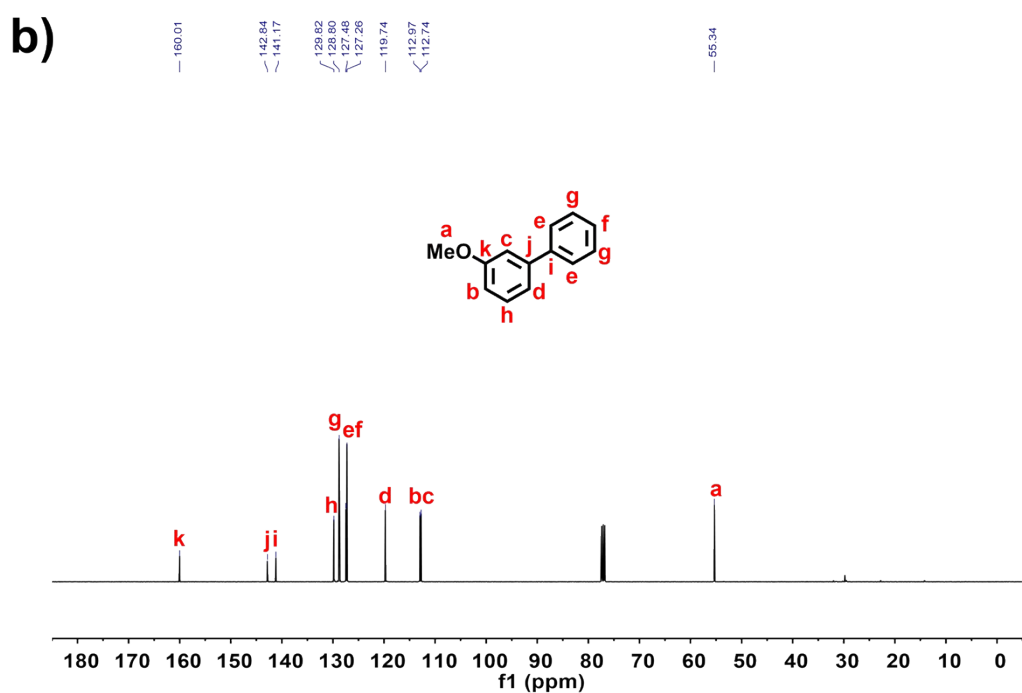

**Fig. S23.** Characterization of 3-methoxybiphenyl. a)  $^1\text{H-NMR}$  (400 MHz,  $\text{CDCl}_3$ , ppm):  $\delta$ =7.57 (d,  $J$ =8 Hz, 2H), 7.42 (t,  $J$ =8 Hz, 2H), 7.43 (m, 2H), 7.16 (d,  $J$ =8 Hz, 1H), 7.12 (s, 1H), 6.88 (dd,  $J_1$ =8 Hz,  $J_2$ =4 Hz, 1H), 3.84 (s, 3H). b)  $^{13}\text{C-NMR}$  (100 MHz,  $\text{CDCl}_3$ , ppm):  $\delta$ =160.01, 142.84, 141.17, 129.82, 128.80, 127.48, 127.26, 119.74, 112.97, 112.74, 55.34.

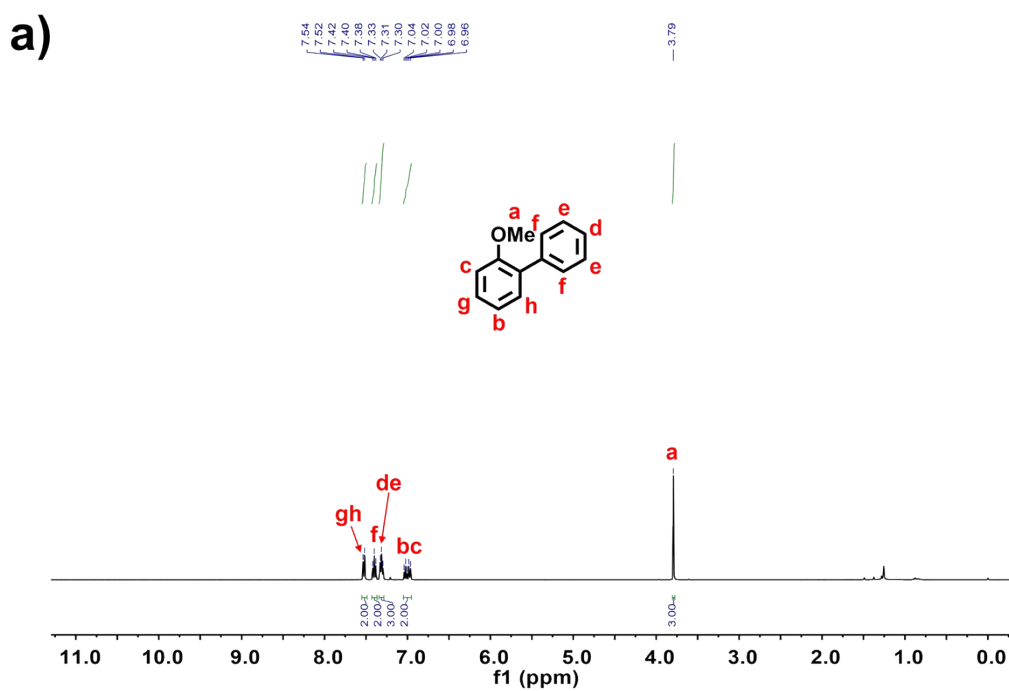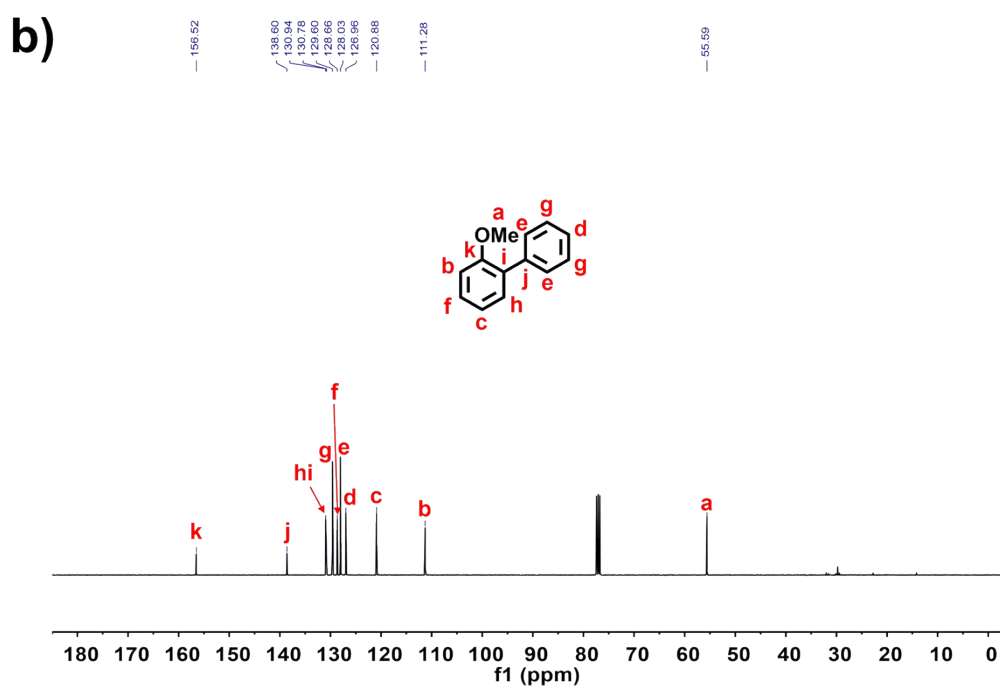

**Fig. S24.** Characterization of 2-methoxybiphenyl. a)  $^1\text{H-NMR}$  (400 MHz,  $\text{CDCl}_3$ , ppm):  $\delta$ =7.52 (d,  $J$ =8 Hz, 2H), 7.40 (t,  $J$ =8 Hz, 2H), 7.31 (m, 3H), 7.00 (m, 2H), 3.79 (s, 3H). b)  $^{13}\text{C-NMR}$  (100 MHz,  $\text{CDCl}_3$ , ppm):  $\delta$ =156.52, 138.60, 130.94, 130.78, 129.60, 128.66, 128.03, 126.96, 120.88, 111.28, 55.59.

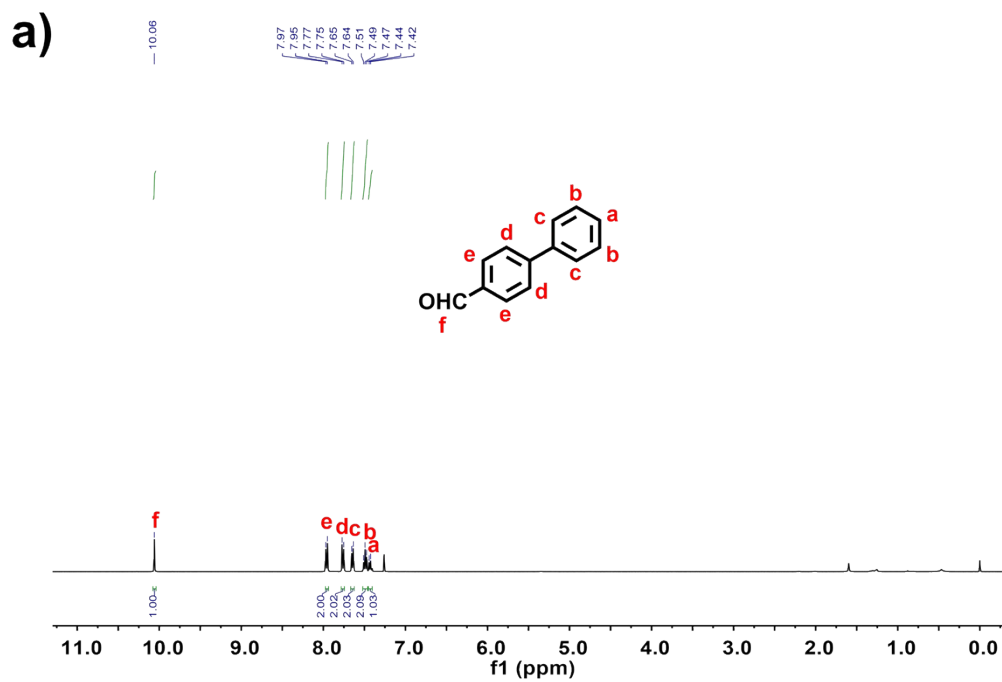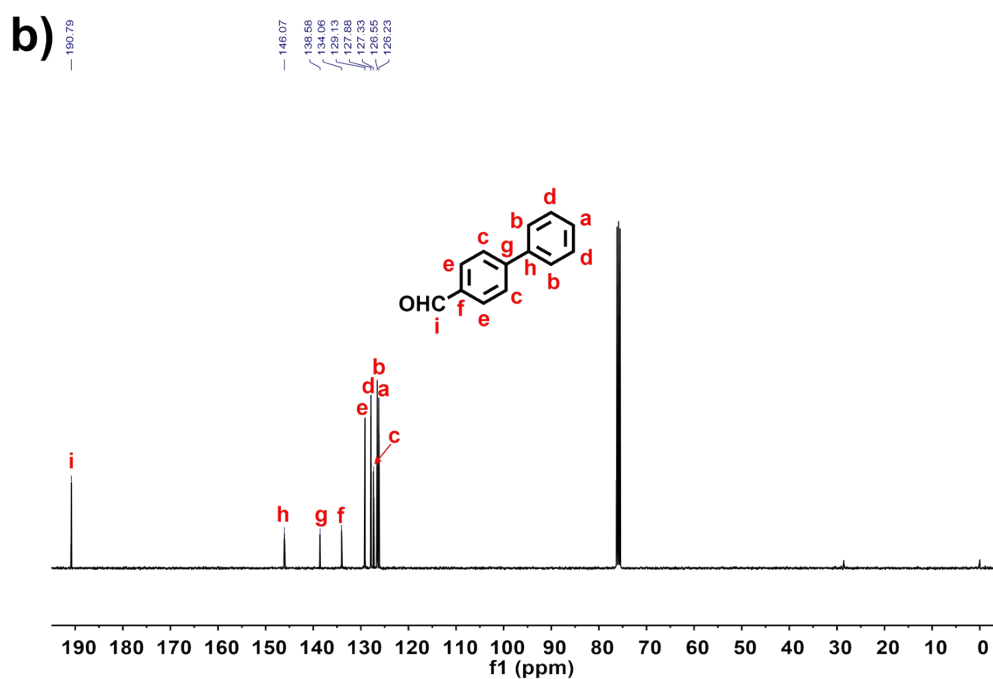

**Fig. S25.** Characterization of 4-biphenylcarboxaldehyde. a)  $^1\text{H-NMR}$  (400 MHz,  $\text{CDCl}_3$ , ppm):  $\delta=10.05$  (s, 1H), 7.95 (d,  $J=8$  Hz, 2H), 7.75 (d,  $J=8$  Hz, 2H), 7.64 (d,  $J=8$  Hz, 2H), 7.49 (t,  $J=8$  Hz, 2H), 7.42 (t,  $J=8$  Hz, 1H). b)  $^{13}\text{C-NMR}$  (100 MHz,  $\text{CDCl}_3$ , ppm):  $\delta=190.79$ , 146.07, 138.58, 134.06, 129.13, 127.88, 127.33, 126.55, 126.23.

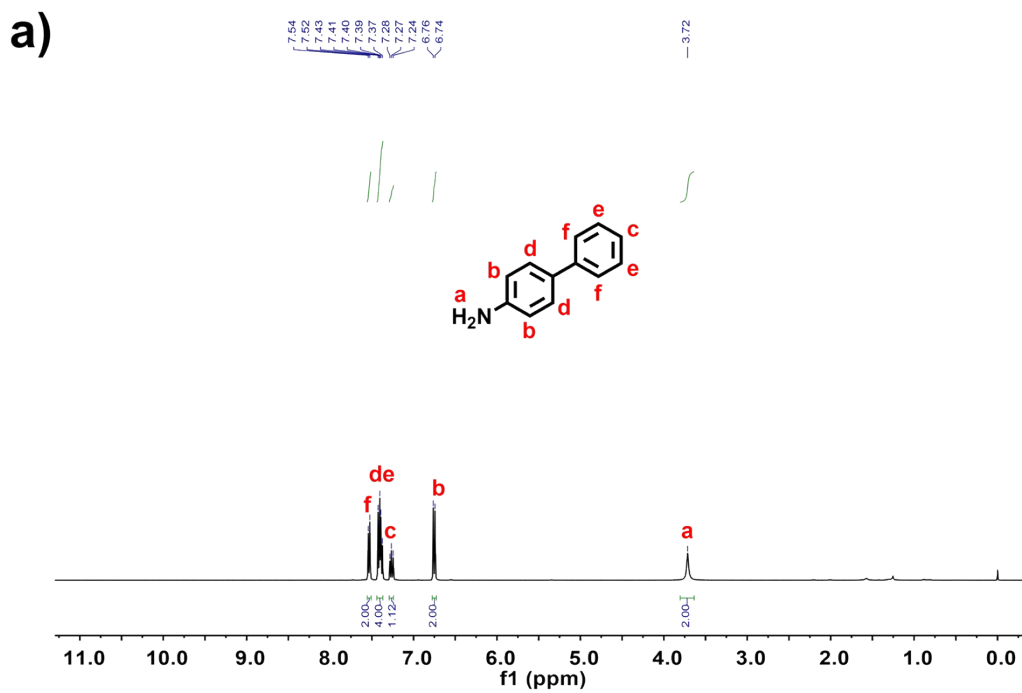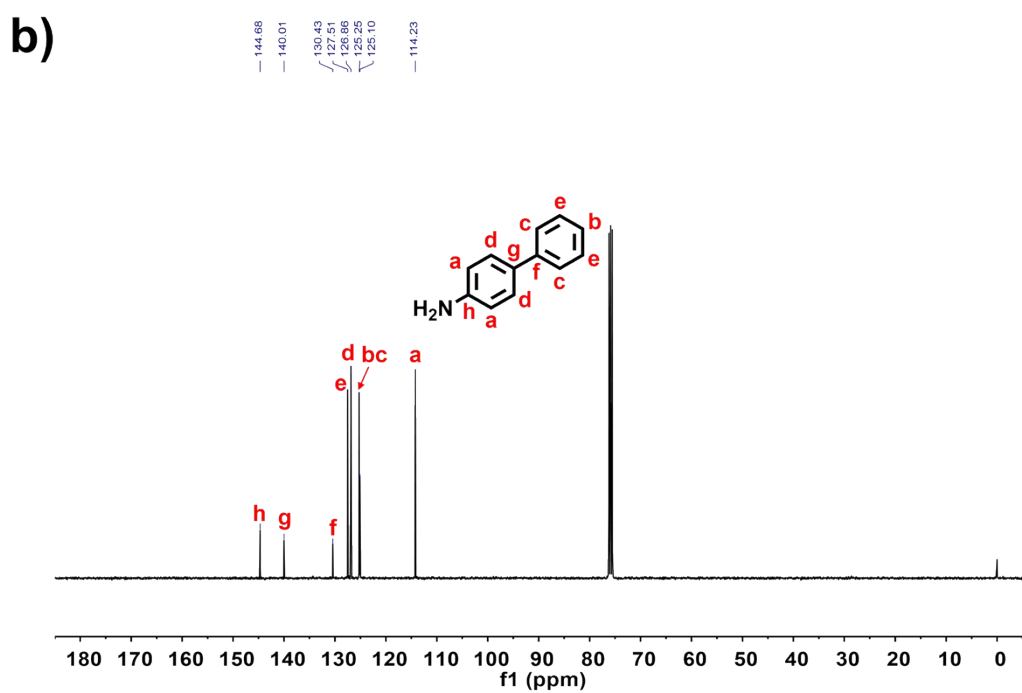

**Fig. S26.** Characterization of 4-aminobiphenyl. a)  $^1\text{H-NMR}$  (400 MHz,  $\text{CDCl}_3$ , ppm):  $\delta=7.52$  (d,  $J=8$  Hz, 2H), 7.40 (m, 4H), 7.27 (t,  $J=4$  Hz, 1H), 6.74 (d,  $J=8$  Hz, 2H), 3.72 (s, 2H). b)  $^{13}\text{C-NMR}$  (100 MHz,  $\text{CDCl}_3$ , ppm):  $\delta=144.68$ , 140.01, 130.43, 127.51, 126.88, 125.25, 125.10, 114.23.

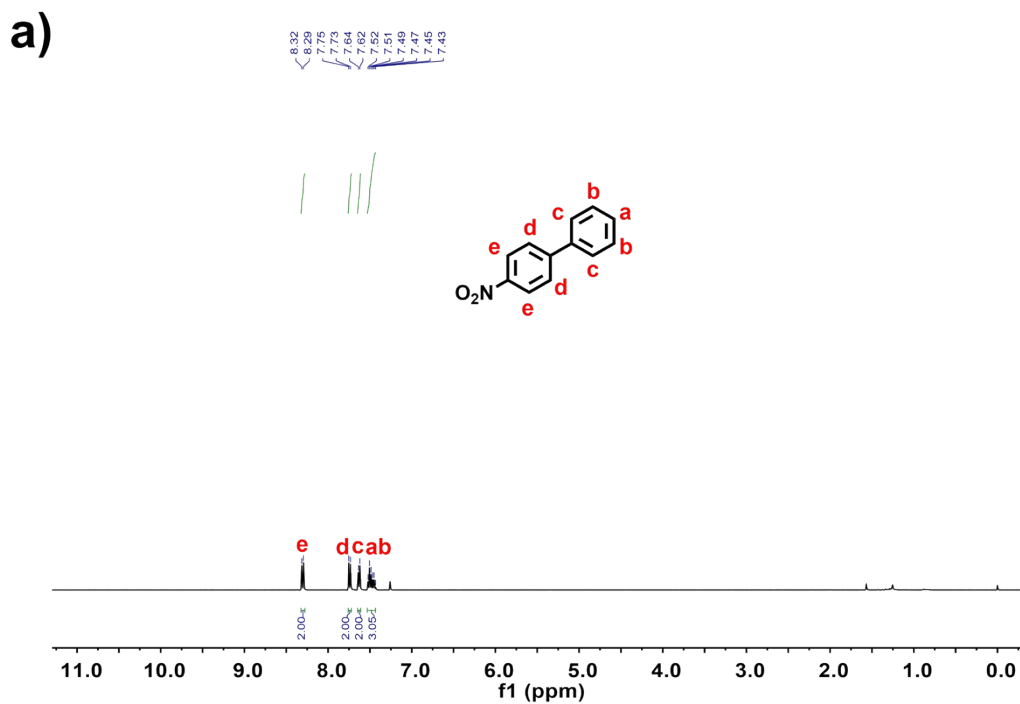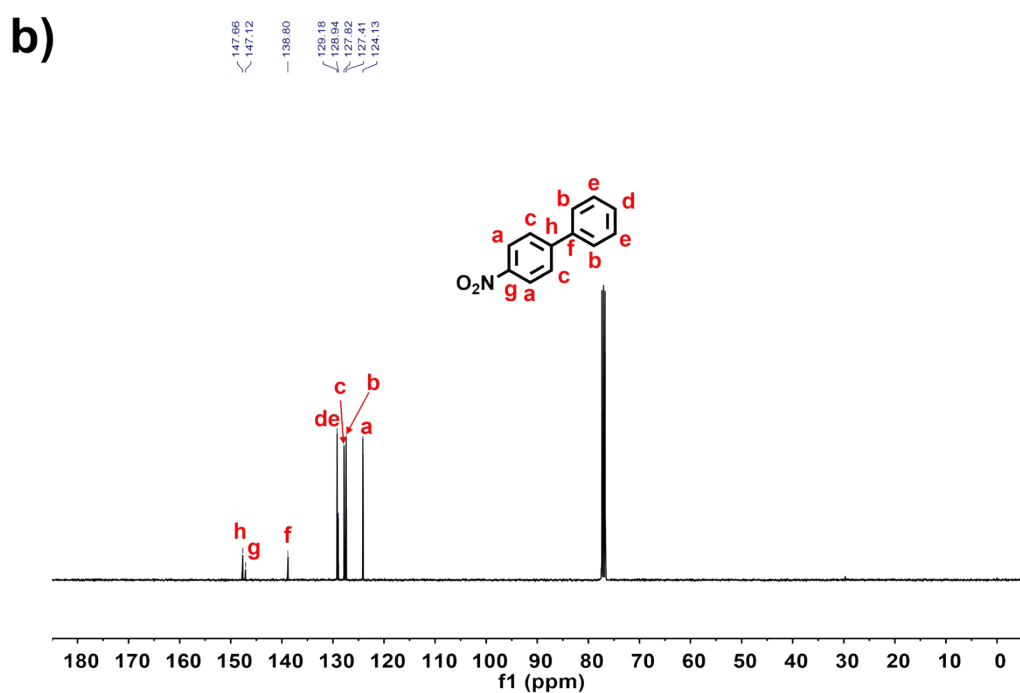

**Fig. S27.** Characterization of 4-nitrobiphenyl. a)  $^1\text{H-NMR}$  (400 MHz,  $\text{CDCl}_3$ , ppm):  $\delta=8.29$  (d,  $J=12$  Hz, 2H), 7.73 (d,  $J=8$  Hz, 2H), 7.62 (d,  $J=8$  Hz, 2H), 7.49 (m, 3H). b)  $^{13}\text{C-NMR}$  (100 MHz,  $\text{CDCl}_3$ , ppm):  $\delta=147.86$ , 147.12, 138.80, 129.18, 128.94, 127.82, 127.41, 124.13.

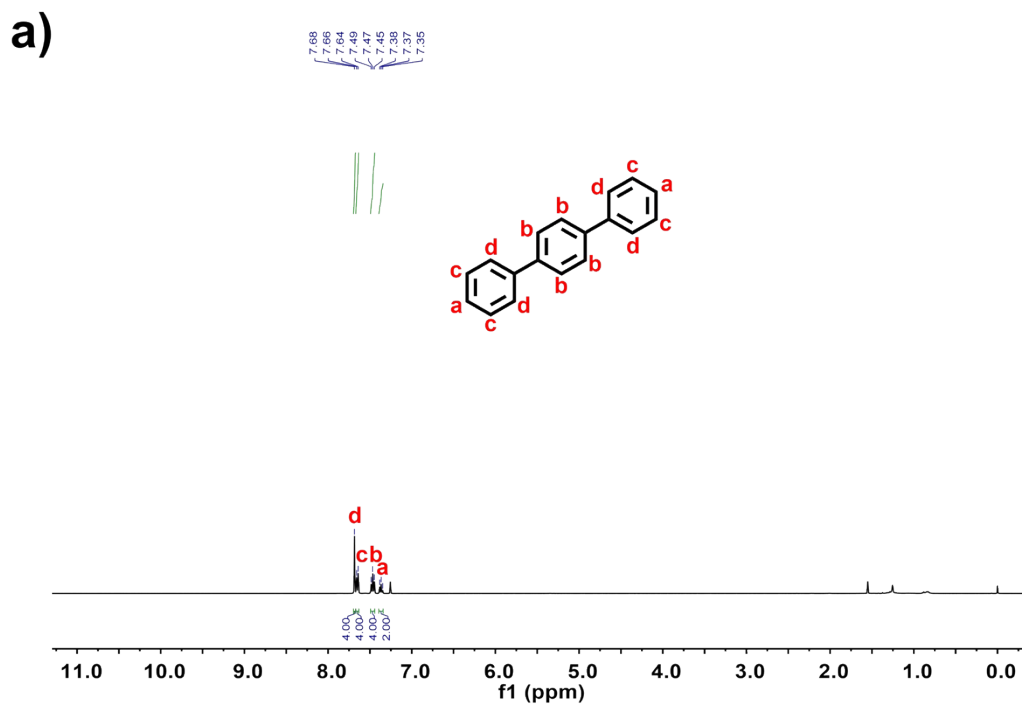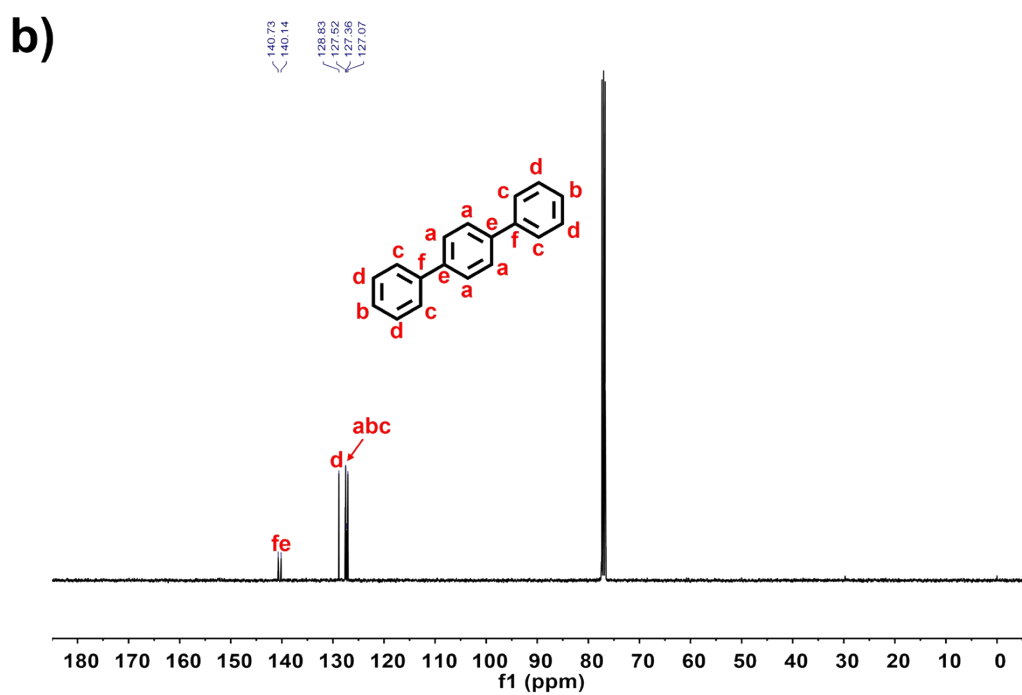

**Fig. S28.** Characterization of p-terphenyl. a)  $^1\text{H-NMR}$  (400 MHz,  $\text{CDCl}_3$ , ppm):  $\delta=7.68$  (s, 4H), 7.64 (d,  $J=8$  Hz, 4H), 7.47 (t,  $J=8$  Hz, 4H), 7.37 (t,  $J=8$  Hz, 2H). b)  $^{13}\text{C-NMR}$  (100 MHz,  $\text{CDCl}_3$ , ppm):  $\delta=140.73$ , 140.14, 128.83, 127.52, 127.36, 127.07.

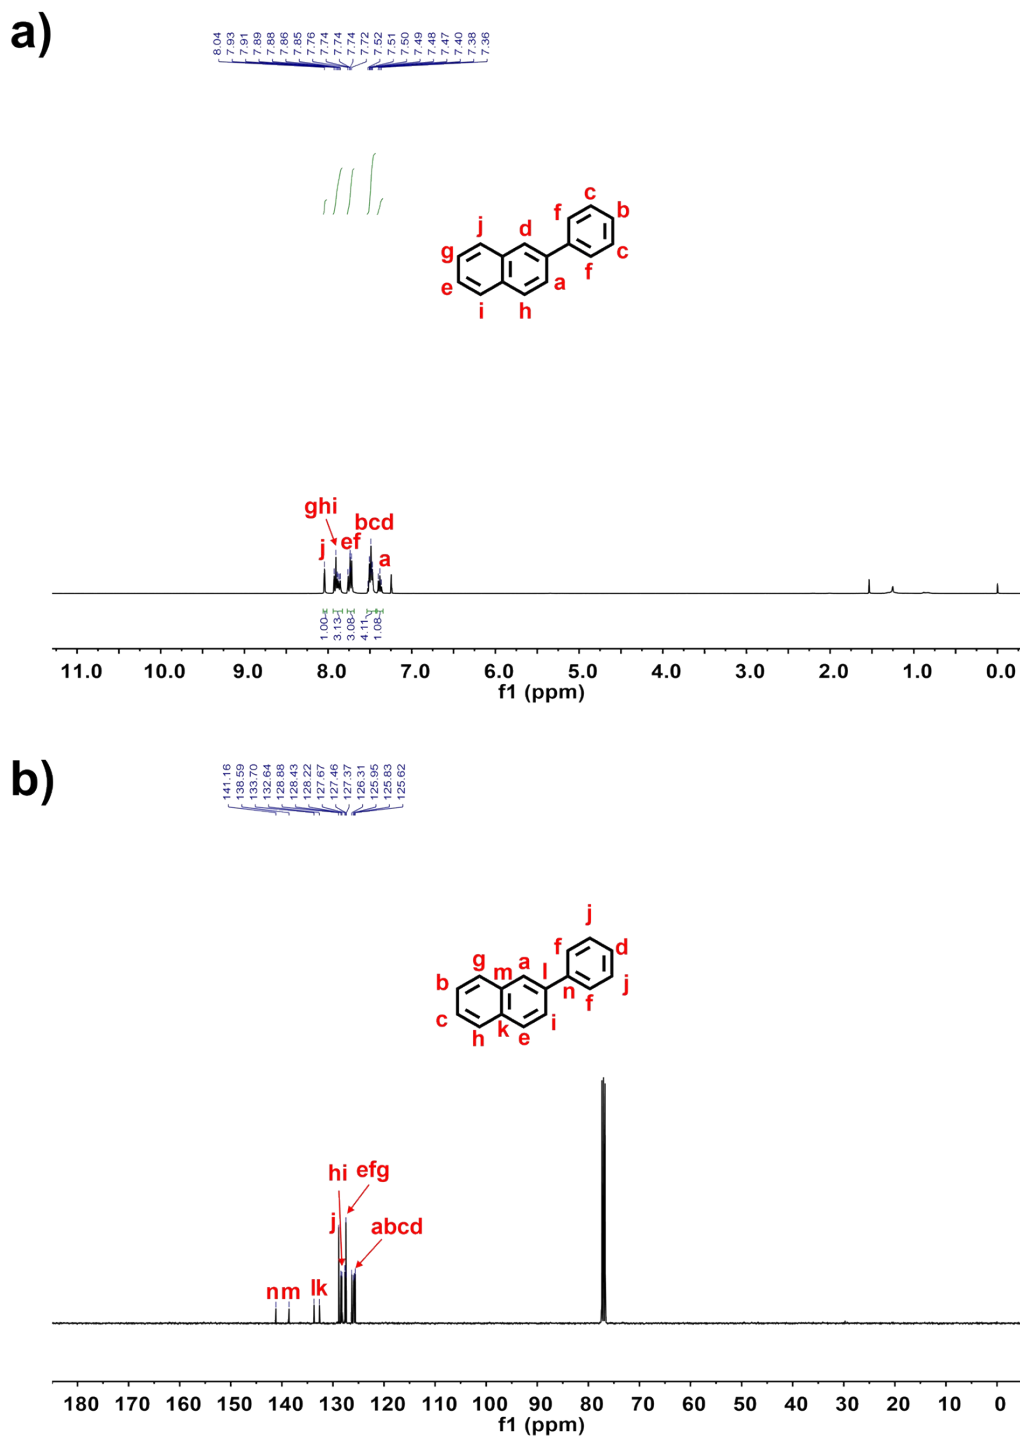

**Fig. S29.** Characterization of 2-phenylnaphthalene. a)  $^1\text{H-NMR}$  (400 MHz,  $\text{CDCl}_3$ , ppm):  $\delta=8.04$  (s, 1H), 7.89 (m, 3H), 7.74 (m, 3H), 7.49 (m, 4H), 7.38 (m, 1H). b)  $^{13}\text{C-NMR}$  (100 MHz,  $\text{CDCl}_3$ , ppm):  $\delta=141.16$ , 138.59, 133.70, 132.64, 128.88, 128.43, 128.22, 127.67, 127.46, 127.37, 126.31, 125.95, 125.83, 125.62.

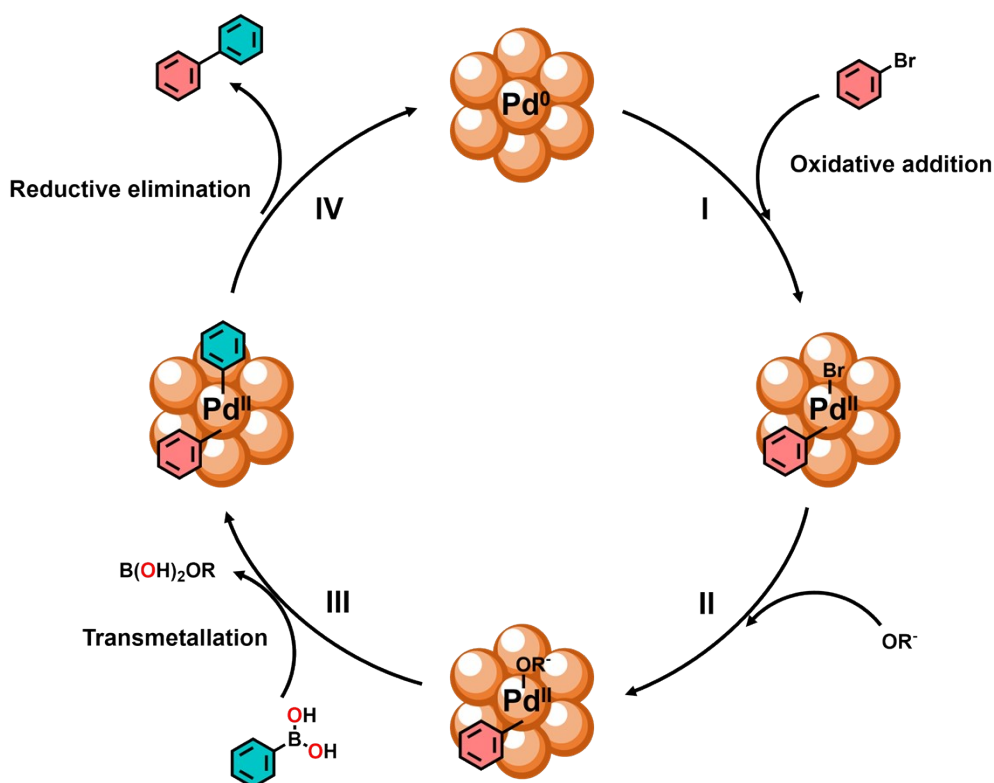

**Fig. S30.** Proposed catalytic cycle for the Suzuki-Miyaura cross-coupling reaction catalyzed by **Pd@AABH-TFBT-COF**, using bromobenzene and phenylboronic acid as the model substrates. The cycle proceeds through three fundamental steps: (I) Oxidative addition: The Pd(0) active species inserts into the C-Br bond of bromobenzene, forming an aryl-Pd(II)-Br intermediate. (II and III) Transmetalation: In the presence of  $\text{K}_2\text{CO}_3$ , phenylboronic acid is activated to generate a tetracoordinate borate species  $[\text{Ph-B(OH)}_2\text{OR}]^-$ . This species transfers the phenyl group to the palladium center, yielding a diaryl-Pd(II) complex (Ph-Pd(II)-Ph). (IV) Reductive elimination: The diaryl-Pd(II) complex undergoes C-C bond formation to release biphenyl and regenerate the Pd(0) catalyst, which then enters the next catalytic cycle.

## 7. References

- 1 D. S. Bohle, Z. Chua, M. Singer Hobbs, I. Perepichka and A. Waked, *Chem. Eur. J.*, 2015, **21**, 13739–13747.
- 2 H. Jin, C. Zhang, P. Liu, X. Ge and S. Zhou, *Appl. Organomet. Chem.*, 2022, **36**, e6642.
- 3 J.-C. Wang, C.-X. Liu, X. Kan, X.-W. Wu, J.-L. Kan and Y.-B. Dong, *Green Chem.*, 2020, **22**, 1150–1155.
- 4 X. Wang, J. Li, L. Wang and M. Szostak, *J. Org. Chem.*, 2025, **90**, 6532–6537.
- 5 S.-Y. Ding, J. Gao, Q. Wang, Y. Zhang, W.-G. Song, C.-Y. Su and W. Wang, *J. Am. Chem. Soc.*, 2011, **133**, 19816–19822.
- 6 H. Pan, N. Wang and G.-W. Wang, *Chem. Commun.*, 2025, **61**, 8184–8187.
- 7 K. Lv, G. Yan, G. Wang, Z. Chen and J. Hu, *Catal. Lett.*, 2023, **153**, 2959–2974.
- 8 Y. Nailwal, M. A. Addicoat, M. Gaurav and S. K. Pal, *ACS Appl. Nano Mater.*, 2023, **6**, 1714–1723.
- 9 C. Krishnaraj, H. S. Jena, K. S. Rawat, J. Schmidt, K. Leus, V. Van Speybroeck and P. Van Der Voort, *ACS Appl. Mater. Interfaces*, 2022, **14**, 50923–50931.
- 10 Y. Liu, C. Wu, Q. Sun, F. Hu, Q. Pan, J. Sun, Y. Jin, Z. Li, W. Zhang and Y. Zhao, *CCS Chem.*, 2020, **3**, 2418–2427.
- 11 J. Liu, H. Zhan, N. Wang, Y. Song, C. Wang, X. Wang, L. Ma and L. Chen, *ACS Appl. Nano Mater.*, 2021, **4**, 6239–6249.

- 12 G. Wang, Z. Chen, G. Yan and J. Hu, *New J. Chem.*, 2023, **47**, 297–306.
- 13 C. Qian, W. Zhou, J. Qiao, D. Wang, X. Li, W. L. Teo, X. Shi, H. Wu, J. Di, H. Wang, G. Liu, L. Gu, J. Liu, L. Feng, Y. Liu, S. Y. Quek, K. P. Loh and Y. Zhao, *J. Am. Chem. Soc.*, 2020, **142**, 18138–18149.
- 14 G. Wang, Z. Hu, Z. Chen, J. Wang, J. Hu and X. Xu, *Appl. Surf. Sci.*, 2023, **631**, 157538.
- 15 M. Bashri, S. Kumar, P. Bhandari, S. Stephen, M. J. O'Connor, S. Gaber, T. Škorjanc, M. Finšgar, G. E. Luckachan, B. Belec, E. Alhseinat, P. S. Mukherjee and D. Shetty, *ACS Appl. Mater. Interfaces*, 2025, **17**, 17804–17812.
- 16 T. Chen, L. Chen, Q. Li, C. Zhou, L. Dong, L. Tan, C. Lu and Z. Liu, *ACS Appl. Mater. Interfaces*, 2025, **17**, 42225–42232.
- 17 A. Hassan, A. Kumar, S. A. Wahed, S. Mondal, A. Kumar and N. Das, *Nanoscale*, 2025, **17**, 4765–4775.
- 18 L. Li, Q. Shan, J. Zang, L. Yu, D. J. Young, Z.-G. Ren and H.-X. Li, *Catal. Sci. Technol.*, 2024, **14**, 7212–7218.
- 19 I. Romero-Muñiz, A. Mavrandonakis, P. Albacete, A. Vega, V. Briois, F. Zamora and A. E. Platero-Prats, *Angew. Chem. Int. Ed.*, 2020, **59**, 13013–13020.
- 20 F. Shukla, M. Patel, Q. Gulamnabi and S. Thakore, *Dalton Trans.*, 2023, **52**, 2518–2532.
- 21 N. Brown, Q. Zhang, Z. Alsudairy, C. Dun, Y. Nailwal, A. Campbell, C. Harrod, L. Chen, S. Williams, J. J. Urban, Y. Liu and X. Li, *ACS Sustain. Chem. Eng.*, 2024, **12**, 13535–13543.
- 22 Y. Hou, X. Zhang, J. Sun, S. Lin, D. Qi, R. Hong, D. Li, X. Xiao and J. Jiang, *Microporous Mesoporous Mater.*, 2015, **214**, 108–114.
- 23 T. Chen, Y. Pang, S. H. Ali, L. Chen, Y. Li, X. Yan and B. Wang, *Mol. Catal.*, 2024, **558**, 114045.
- 24 Z. Tao, Q. Zhang, Q. Xie, H. Qu, Y. Liu, L. Kong, G. Xu, S. Zhang and Z. Zhou, *Surf. Interfaces*, 2024, **55**, 105313.
